# 1           **Why do fungicide mixtures delay the evolution of resistance?**

## 2                           **An experimental evolutionary approach**

3

4    Agathe Ballu<sup>1</sup>, Anne Dérédec<sup>1</sup>, Anne-Sophie Walker<sup>1\*</sup>, Florence Carpentier<sup>2,3\*</sup>

5

6    \*These authors contributed equally to this work

7    Corresponding author: Florence Carpentier [florence.carpentier@agroparistech.fr](mailto:florence.carpentier@agroparistech.fr)

8    <sup>1</sup>Université Paris-Saclay, INRAE, AgroParisTech, UMR BIOGER, 78850 Thiverval-Grignon,

9    France

10   <sup>2</sup>Université Paris-Saclay, INRAE, UR MaIAGE, 78350 Jouy-en-Josas, France

11   <sup>3</sup>AgroParisTech, 75005 Paris, France

12

13    ORCID numbers:

14    Florence Carpentier: <https://orcid.org/0000-0001-6204-2220>

15    Anne-Sophie Walker: <https://orcid.org/0000-0002-1246-246X>

16

17

18

## 19 Abstract

20 Pesticide resistance poses a critical threat to agriculture, human health and biodiversity.  
21 Mixtures of fungicides are recommended and widely used in resistance management  
22 strategies. However, the components of the efficiency of such mixtures remain unclear. We  
23 performed an experimental evolution study on the fungal pathogen *Z. tritici*, to determine how  
24 mixtures managed resistance. We compared the effect of the continuous use of single active  
25 ingredients to that of mixtures, at the minimal dose providing full control of the disease, which  
26 we refer to as the "efficient" dose. We found that the performance of efficient-dose mixtures  
27 against an initially susceptible population depended strongly on the components of the  
28 mixture. Such mixtures were either as durable as the best mixture component used alone, or  
29 worse than all components used alone. Moreover, efficient-dose mixture regimes probably  
30 select for generalist resistance profiles as a result of the combination of selection pressures  
31 exerted by the various components and their lower doses. Our results indicate that mixtures  
32 should not be considered a universal strategy. Experimental evaluations of specificities for the  
33 pathogens targeted, their interactions with fungicides and the interactions between fungicides  
34 are crucial for the design of sustainable resistance management strategies.

35

## 36 Keywords

37 experimental evolution; fungicide resistance; selection drivers; generalism, ecological  
38 specialization; environmental variation; selection heterogeneity; mixture; dose variation;

39 *Zymoseptoria tritici*

40

## 41 Introduction

42           The widespread use of pesticides and drugs has led to the rapid evolution of resistance,  
43 which reduces or even abolishes their efficacy in some situations [1]. Resistance management  
44 is therefore crucial, to prevent the overuse of pesticides, which would be deleterious to human  
45 health and biodiversity, and to maintain sufficient levels of high-quality agricultural production,  
46 in a context in which the number of new modes of action (MoA) discovered is dwindling and  
47 agricultural practices favour the emergence and spread of resistance [2]. Management  
48 strategies aim to slow resistance build-up by maximising the heterogeneity of selection  
49 pressure. This may involve dose reduction and/or combinations of different MoAs in space and  
50 time [3].

51 Fungicide mixtures (*i.e.* the combination of two or more fungicides within the same treatment)  
52 are the most widely used, studied and recommended strategy for controlling plant pathogens  
53 (FRAC recommendations for fungicide mixtures 2010; REX Consortium 2013). The efficacy of  
54 such strategies for delaying the development of resistance and maintaining disease control has  
55 been demonstrated in both empirical and modelling studies [4–6]. The adoption of this strategy  
56 is also driven by practical concerns, as many manufacturers offer ready-to-use commercial  
57 mixtures, and it is possible to design tank mixtures with the same active ingredients (AIs) [7].  
58 Finally, one side benefit of mixtures is that they can be used to control multiple pathogens with  
59 a single spray (*i.e.* they broaden the activity spectrum).

60 Several non-exclusive processes can account for the efficacy of mixtures. First, mixtures expose  
61 pathogens simultaneously to several fungicides (*i.e.* multiple intragenerational killing (REX  
62 Consortium 2013)), and the evolution of specific resistance to each of the mixture components

63 (*i.e.* multiple resistance) is less likely than the evolution of resistance to a single fungicide [8].  
64 Second, according to the established “governing principles” of resistance management, the  
65 growth rate of individuals with single resistances (*i.e.* resistant to one AI) is decreased by the  
66 use of mixtures of fungicides [4,9]. The AIs mixed can control both resistant and susceptible  
67 strains, resulting in decreases in the growth rates of both resistant and susceptible strains, and  
68 a decrease in the selection coefficient, defined as the difference between these growth rates.

69 Dose reduction can also be used to control resistance; this strategy acts by reducing the growth  
70 rate of resistant individuals [4]. Most of the available empirical and theoretical evidence  
71 indicates high doses increase selection once resistance has emerged, although there are  
72 counter-examples that can be explained by the convergence of the dose-response curves of  
73 resistant and susceptible strains at high doses [10]. During the emergence phase, the effect of  
74 dose is highly specific to the interaction between the fungicide and the pathogen, with high  
75 doses having either a beneficial or a deleterious influence on resistance. The use of high doses  
76 to keep the pathogen population small limits the mutation load but accelerates the selection  
77 of any mutations that do emerge [11]. Theoretical studies have shown that, for an  
78 overwhelming majority of realistic parameters of fungicide-pathogen combinations, low-dose  
79 strategies better limit the emergence of qualitative resistance [11,12].

80 The combination of mixtures with dose reduction in “efficient-dose mixtures” (*i.e.* mixtures of  
81 reduced doses of AI but providing a similar level of disease control to that provided by these  
82 components used alone at their full authorised rate) may decrease the rate at which resistant  
83 individuals are selected, thereby increasing fungicide durability [4]. The socio-environmental  
84 benefits of reducing the rates of fungicides in mixtures are obvious, but, in practice, commercial  
85 mixtures nevertheless include fungicide components at or close to their full rate for use on

86 their own (*e.g.* in commercial products used on wheat to control septoria leaf blotch; Table S1).  
87 Efficient-dose mixtures are thus rarely used, possibly due to the difficulties of evaluating their  
88 potential advantages. First, such mixtures may not display the beneficial effects of high-dose  
89 strategies, long advocated as a means of reducing the occurrence of mutations and,  
90 particularly, the selection of partially resistant mutants, putative mutational stepping stones to  
91 high-level resistance. Second, the efficacy of efficient-dose mixtures may be equivocal because  
92 it may depend on the biology of the pathogen (*e.g.* its ploidy and mode of reproduction; [3,13]),  
93 fungicide performance [14], the interaction between mixture components (antagonism or  
94 synergism; [13,15,16]) and resistance costs [17]. Third, most studies on mixture durability have  
95 focused on the evolution of specific resistance to the fungicide considered most at risk of  
96 resistance development, rather than the durability of the mixture itself. Finally, the assessment  
97 of mixture strategies usually focuses on their performance during the selection phase rather  
98 than the emergence phase of resistance dynamics [3,12].

99 We performed an experimental evolution study to determine how an efficient-dose mixture  
100 could be used to manage resistance, with a view to improving comparisons with strategies  
101 based on single AIs. In particular, we analysed how mixture components drove the quantitative  
102 and qualitative performance of this strategy. We studied *Zymoseptoria tritici*, an ascomycete  
103 responsible for septoria leaf blotch (STB), a major disease of winter wheat [18]. STB accounts  
104 for up to 70% of fungicide use in Western Europe [19]. Various degrees of resistance to all  
105 authorised single-site inhibitors (*i.e.* with a single biochemical mode of action) — inhibitors of  
106 the polymerization of  $\beta$ -tubulin or benzimidazoles, inhibitors of cytochrome *b* of mitochondrial  
107 complex III or QoIs, inhibitors of succinate dehydrogenase (a component of mitochondrial  
108 complex II of respiration or SDHIs, and inhibitors of sterol 14 $\alpha$ -demethylase or DMIs — have

109 been observed in *Z. tritici* in France [20]. Resistance results from mutations affecting the target  
110 sites for these four MoAs. Target overexpression has also been demonstrated for DMIs.  
111 Overexpression of the MFS1 transporter causes enhanced efflux [21], a generalist mechanism  
112 causing multidrug resistance (MDR) affecting all MoAs but with a limited impact on the  
113 susceptibility of isolates.

114 Using an approach previously developed for the study of resistance selection in alternation  
115 strategies [22], we observed the evolution of resistance in a haploid yeast-like easily cultured  
116 form of a fully susceptible strain of *Z. tritici*. We first compared the rates of resistance evolution  
117 under single or mixed fungicide treatments, for three AIs with different modes of action applied  
118 in amounts resulting in similar efficacy (*i.e.* EC<sub>90</sub>). We then determined the cross-resistance  
119 profiles of the evolved lines, assessing whether the efficacy of fungicide mixtures was  
120 counterbalanced by an increase in the occurrence of generalist resistance profiles. Finally, we  
121 investigated how the heterogeneity of selection pressure associated with efficient-dose  
122 mixtures determined the cross-resistance profiles in evolved strains, relative to strains exposed  
123 to a single fungicide at a similarly effective or lower dose.

124

## 125 Materials and methods

### 126 *General design*

127 The protocol of the experimental evolution was adapted from that of a previous study  
128 [22].

129 The ancestral *Z. tritici* isolate used was IPO323, which is susceptible to all fungicides. Cultures  
130 on YPD plates (20 g.L<sup>-1</sup> dextrose, 20 g.L<sup>-1</sup> peptone, 10 g.L<sup>-1</sup> yeast extract, 20 g.L<sup>-1</sup> agar;  
131 USBiological) incubated at 18°C in the dark for seven days were used to prepare a founding  
132 culture in 25 mL liquid YPD (composition as above, but without agar) in a 50 mL Erlenmeyer  
133 flask plugged with cotton wool. This primary culture was incubated in similar conditions for  
134 seven days, with shaking at 50 rpm, and was used to establish all the other lines.

135 The various lines were cultured as described above, in in 25 mL liquid YPD medium in 50 mL  
136 Erlenmeyer flasks. Each fungicide treatment was repeated on four independent populations  
137 (*i.e.* lines). Each Erlenmeyer flask was inoculated with 10<sup>7</sup> spores (500 µL of the primary culture).  
138 Control lines were not treated with fungicides and contained the same amount of solvent as  
139 was introduced for the treated lines. Experimental evolution was allowed to occur over seven-  
140 day cycles (*i.e.* roughly six to seven generations per cycle). This cycle duration made it possible  
141 to keep cultures in the exponential growth phase (without reaching stationary phase). At the  
142 each end of cycle, 2% of the evolved culture was transferred to a new Erlenmeyer flask  
143 containing fresh medium. We ensured that population sizes were equivalent at the start of each  
144 cycle by mimicking immigration from external populations through the addition of spores from  
145 the untreated line to reach a total of 10<sup>7</sup> spores for each line. OD<sub>405</sub> was measured at the end  
146 of each cycle and used to calculate population size (see [22] for details). Malthusian growth  
147 was calculated for each line as previously described [23]:

$$148 \quad m = \ln\left(\frac{\text{cell density at the end of the cycle, day 7}}{\text{cell density at the beginning of the cycle, day 0}}\right)$$

149 Spore concentration and Malthusian growth were normalized against the concentration and  
150 Malthusian growth, respectively, of the control line.

151

152 *Selection regimes and selection doses*

153 We designed selection regimes for studies of the influence of three different factors on  
154 resistance evolution. First, selection regimes differed in the number of AIs used (from 1 = direct  
155 use to 2-3 = mixtures). Second, the AIs chosen corresponded to different modes of action:  
156 prothioconazole-desthio (P; a DMI), benzovindiflupyr (B; a SDHI) and carbendazim (C; a  
157 benzimidazole). Finally, each AI was applied at several concentrations: an efficient dose and  
158 reduced doses (indicated by line names including a subscript r). All single fungicides were  
159 applied at the full efficient dose and at reduced doses, continuously, over the course of the  
160 experiment. All combinations of AIs were applied at the full efficient dose. We observed  $16 \times 4$   
161 = 64 independent lines (Table 1). The experiment was conducted over 10 cycles for all but six  
162 of the lines (BP, BCP, Br2, Cr1, Cr2, Pr2) for which it was conducted over only nine cycles  
163 (calibration problem for the first cycle).

164

165 **Table 1: Doses of fungicides B, C and P and of their mixtures used to select resistance in**  
166 **the various experimental evolution regimes.** The proportion of the reference dose applied refers  
167 to the efficient dose of the mixture. For example, the selection dose of the CP mixture was  $EC_{90}(CP)=0.082$   
168  $mg.L^{-1}$  of C +  $0.00205 mg.L^{-1}$  of P, *i.e.*  $0.41 \times (EC_{90}(C) + EC_{90}(P))$ . The interaction between AIs was  
169 calculated with the Wadley formula (*Wadley, 1945*). Each selection regime is associated to a specific  
170 colour, as used in the results figures, in the first column.



| Selection regime | name | Proportion of the reference dose applied per cycle | Interaction between AIs | Observed efficacy in the 1 <sup>st</sup> cycle | Benzovindiflupyr mg.L <sup>-1</sup> | Carbendazim mg.L <sup>-1</sup> | Prothioconazole-desthio mg.L <sup>-1</sup> |
|------------------|------|----------------------------------------------------|-------------------------|------------------------------------------------|-------------------------------------|--------------------------------|--------------------------------------------|
| <b>B</b>         |      | 1.00                                               |                         | 0.92                                           | 0.5                                 |                                |                                            |
| <b>Br1</b>       |      | 0.53                                               |                         | 0.62                                           | 0.263                               |                                |                                            |
| <b>Br2</b>       |      | 0.50                                               |                         | 0.73                                           | 0.25                                |                                |                                            |
| <b>C</b>         |      | 1.00                                               |                         | 0.90                                           |                                     | 0.2                            |                                            |
| <b>Cr1</b>       |      | 0.45                                               |                         | 0.92                                           |                                     | 0.09                           |                                            |
| <b>Cr2</b>       |      | 0.40                                               |                         | 0.95                                           |                                     | 0.08                           |                                            |
| <b>P</b>         |      | 1.00                                               |                         | 0.89                                           |                                     |                                | 0.005                                      |
| <b>Pr1</b>       |      | 0.80                                               |                         | 0.86                                           |                                     |                                | 0.004                                      |
| <b>Pr2</b>       |      | 0.60                                               |                         | 0.54                                           |                                     |                                | 0.003                                      |
| <b>BC</b>        |      | 0.68                                               | 0.74                    | 0.90                                           | 0.34                                | 0.136                          |                                            |
| <b>CP</b>        |      | 0.41                                               | 1.22                    | 0.90                                           |                                     | 0.082                          | 0.00205                                    |
| <b>BP</b>        |      | 0.60                                               | 0.83                    | 0.92                                           | 0.3                                 |                                | 0.003                                      |
| <b>BCP</b>       |      | 0.42                                               | 0.79                    | 0.89                                           | 0.21                                | 0.084                          | 0.0021                                     |

171

172 Efficient doses were chosen so that each treatment, whether a mixture or a fungicide alone,  
 173 exerted a selection pressure of similar intensity on a naive population. Dose-response curves  
 174 were established for the three AIs: B, C and P. EC<sub>90</sub> values were established as the fungicide  
 175 concentration inhibiting 90% of growth relative to untreated lines after seven days. For each  
 176 selection regime, we used the EC<sub>90</sub> as the reference dose because it was not possible to  
 177 determine the MIC (*i.e.* the minimal inhibitory concentration) experimentally. Fungicide

178 mixtures were prepared with the same proportion of the  $EC_{90}$  for each AI, to ensure a similar  
179 contribution of each fungicide to overall efficacy. Dose-response curves were also established  
180 for each of the three possible pairs of AIs with a range of proportions of the  $EC_{90}$  (*i.e.* from  
181 roughly 0.41 to 0.68 times the  $EC_{90}$  of each AI; Table 1). Table 1 details the final doses used in  
182 the different selection regimes. We calculated their interaction R, as  $R = EC_{90}^{theo}/EC_{90}^{obs}$ , with  
183 the Wadley formula,

184 
$$i.e. EC_{90}^{theo} = \frac{1}{\sum_{i \in M} f_i EC_{90}^i}$$

185 where  $M$  is the mixture of AIs,  $f_i$  is the proportion of AI  $i$  in the mixture (calculated from AI  
186 concentrations) and  $EC_{90}^i$  is the  $EC_{90}$  of AI  $i$ .  $EC_{90}^{obs}$  is the sum of AI concentrations in the mixture  
187 [24]. By definition, additive interactions were positive. Synergism was considered to occur if R  
188 exceeded 1 and negative interactions were considered to result in antagonism if R was lower  
189 than 1.

190

### 191 *Establishment of resistance phenotype profiles at the end of the experiment*

192 At the end of the evolution experiment, we performed droplet tests on each of the lines  
193 that had gone through nine cycles (*i.e.* the last cycle common to all lines) of selection, to  
194 characterize their resistance profiles.

195 For each line, four droplets with spore densities adjusted to  $10^7$ ,  $10^6$ ,  $10^5$  and  $10^4$  spores.mL<sup>-1</sup>  
196 were deposited on solid YPD medium to which a discriminatory dose of fungicide had been  
197 added in a square Petri dish. The discriminatory doses were validated in preliminary  
198 experiments and were designed to prevent the growth of the susceptible ancestral IPO323

199 isolate but to allow the growth of reference resistant isolates from our collections. The ancestral  
200 isolate IPO323 and a negative control were included in each test. Lines evolved under efficient  
201 doses were subjected to eight different conditions: the efficient doses of each of the single AIs,  
202 the efficient doses of each of the four AI combinations and tolnaftate at 2 mg.L<sup>-1</sup>. We used  
203 tolnaftate as a marker of generalist resistance. Lines exposed to reduced doses were subjected  
204 to the same set of discriminatory doses and to nine additional discriminatory doses,  
205 corresponding to the selection dose of each AI in mixtures (Table 1).

206 Each test was scored according to the rank of the droplet with the lowest concentration of  
207 spores allowing growth (*e.g.* a score of 2 was attributed if growth was observed for both the  
208 first and second dilution, but not for the third or fourth spore dilution).

209

## 210 *Statistical analysis*

211 We compared the mean growth of lines over the course of the experiment by one-way  
212 ANOVA with line as a factor. Four ANOVAs were performed, one per mixture. Pairwise  
213 comparisons between lines were performed with Tukey *post-hoc* correction. Resistance  
214 dynamics analyses were performed with a non-parametric permutation test (10<sup>4</sup> permutations)  
215 for repeated measures, with spore concentration as the dependent variable, selection regime  
216 and cycle as explanatory variables and line as a repeated unit of observation. Multiple pairwise  
217 *P* values were obtained after Bonferroni correction. The number of selection regimes against  
218 which a line was resistant, and its mean resistance score, were calculated as the number and  
219 mean of scores strictly greater than zero in its resistance profile, respectively. Linear models  
220 were used for the analysis, with the number of resistances modelled with a quasi-Poisson

221 distribution and the mean resistance score modelled with a logGaussian distribution, with the  
222 type of selection regime (a single AI or two-or-three-AI mixture) and the selection regime  
223 nested within selection regime type as the explanatory variables.

224 The structuration of the resistance profiles of lines exposed to single AIs or efficient-dose  
225 mixtures was represented by a heatmap of the resistance phenotype profiles detected at the  
226 end of the experiment, after nine cycles. The Euclidean pairwise distance was used for the  
227 hierarchical clustering of these profiles, with dendrograms for the rows and columns. We also  
228 performed a principal component analysis (PCA). The effect of dose is represented by three  
229 heatmaps of the resistance phenotype profiles of lines exposed to a single fungicide at efficient  
230 or reduced doses.

231 The effects of AI number, alternation partner (C or P) and their interaction with reduced dose  
232 exposure (single fungicide or mixture) on tolnaftate resistance score were investigated with a  
233 linear model (quasi-Poisson GLM model determined by stepwise variable selection from a  
234 Poisson GLM), with exclusion of the lines in which no resistance emerged (*i.e.* the control lines  
235 and B and BP lines).

236 All analyses and figures were produced with R 4.0.4 and the packages CAR, EMMEANS, FACTOEXTRA,  
237 EZ, GGLOT2, GGPUBR, COWPLOT, GRIDEXTRA, MULTCOMP and FACTOMINER.

238

## 239 **Results**

240 *Mixture durability strongly depends on mixture components*

241 In this experiment, all selection regimes, whether a mixture or a single AI, were designed  
242 to have the same efficacy (90% efficacy) relative to the untreated control. The selection doses  
243 were therefore fixed at the  $EC_{90}$  (hereafter referred to as the “efficient dose”) after the  
244 establishment of dose-response curves for each AI and their four possible mixtures. For the CP  
245 mixture, the level of interaction was  $R=1.22$  with the IPO-323 isolate, which is greater than one  
246 and, therefore, suggestive of some synergism. R values were below 1 for the other mixtures  
247 applied on the same isolate, suggesting antagonism (BC: 0.74, BP: 0.83 and BCP: 0.79) (Table  
248 1). These interactions (synergy or antagonism) were considered non-significant as  $R<1.5$  for  
249 synergy and  $R>0.5$  for antagonism, according to the criteria proposed in a previous study [24].

250 We observed the dynamics of *Z. tritici* after experimental evolution in independent lines  
251 subjected to treatment with single fungicides or mixtures of fungicides designed to be 90%  
252 effective, for three fungicides with different modes of action: benzovindiflupyr (B), carbendazim  
253 (C) and prothioconazole-desthio (P) (Figure 1A). Variability was generally low between the four  
254 lines exposed to the same treatment. For lines under continuous exposure to a single AI at its  
255 efficient dose, resistance emerged first in lines exposed to C and P: the normalised spore  
256 concentration (hereafter referred to simply as the spore concentration) of the C and P lines  
257 exceeded 20% (double the initial concentration) after five cycles, and resistance was  
258 generalised (spore concentration above 90%) after eight and nine cycles for C and P,  
259 respectively. For lines exposed to B, no clear emergence of resistance was emerged, with spore  
260 concentration remaining below 20% after 10 cycles.

261

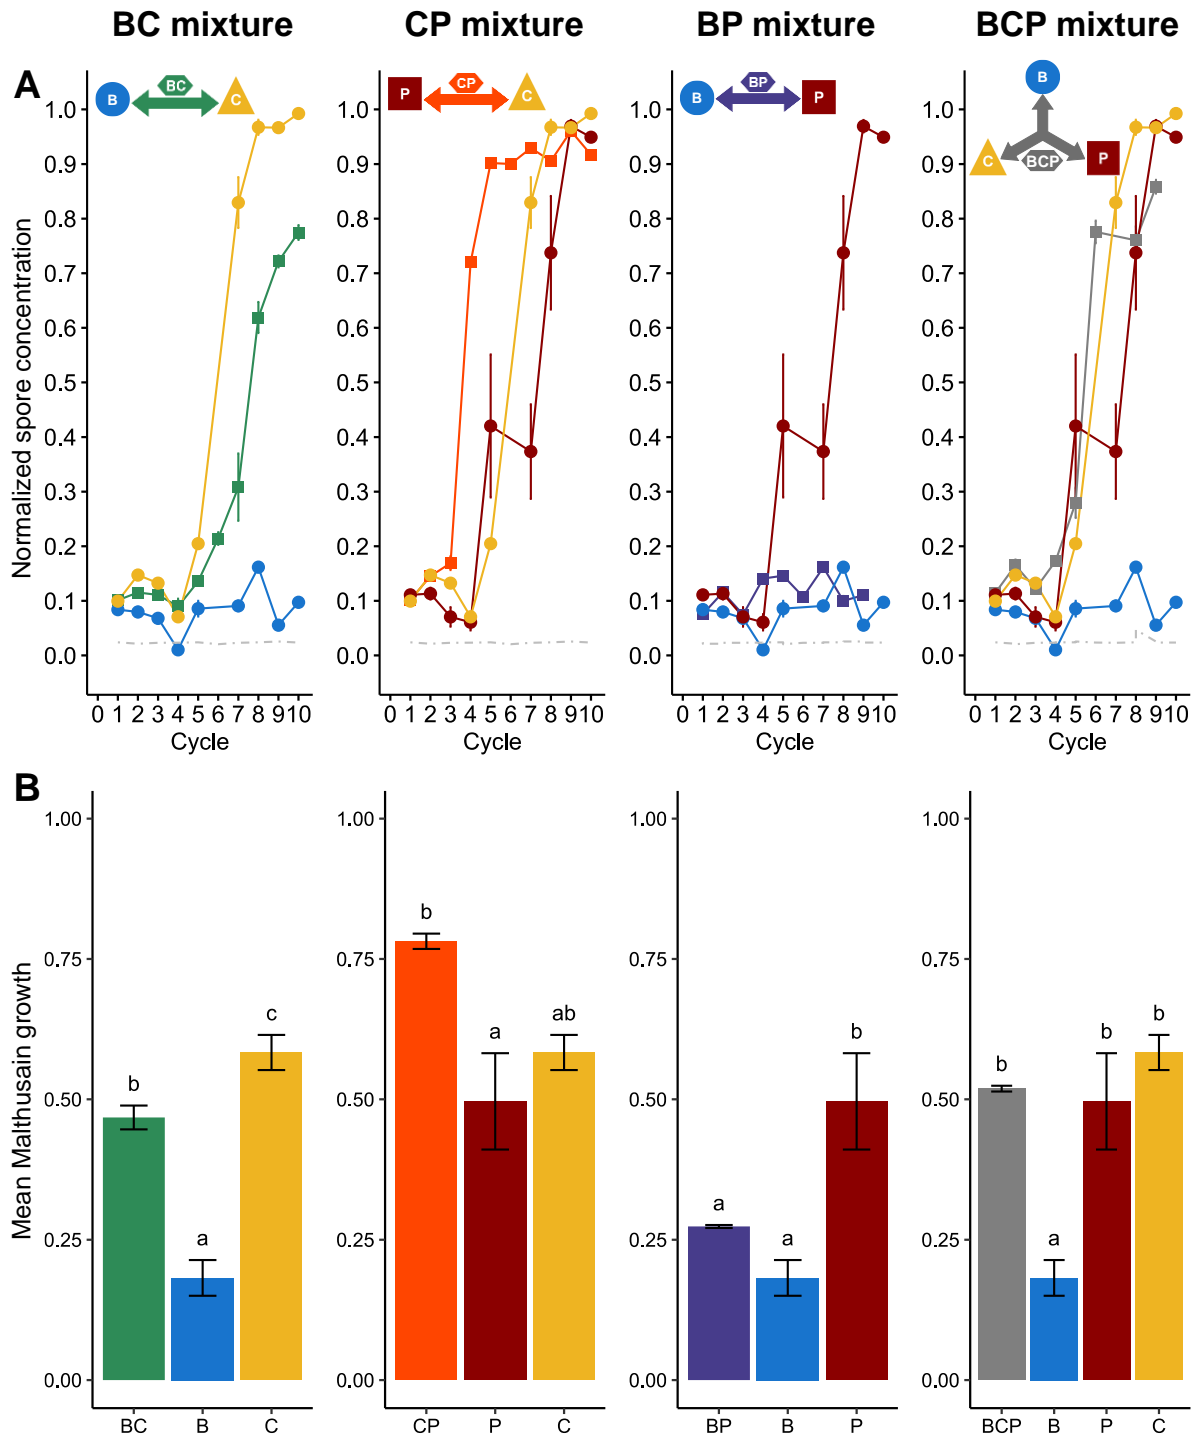

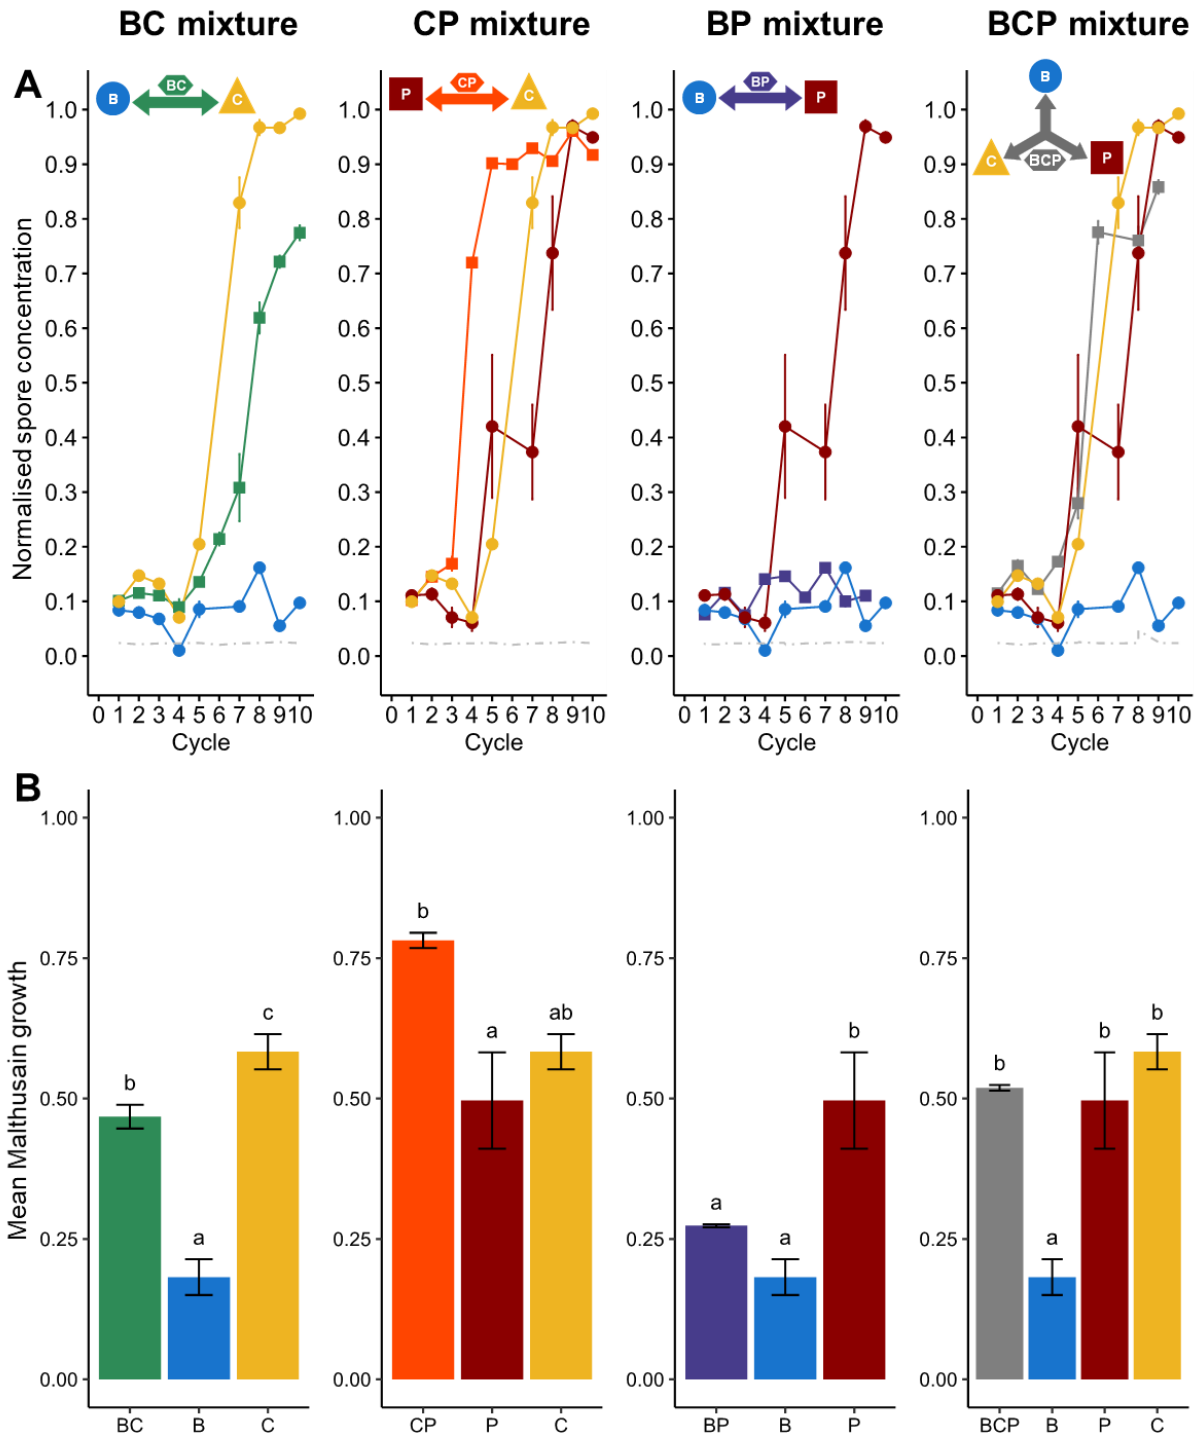

263

264 **Figure 1: Dynamics of resistance evolution in the lines selected at 90% treatment efficacy.**

265 Each column represents the results for a pair of fungicides used alone or as a mixture, at their efficient

266 dose, as explained in the pictograms at the top. B: benzovindiflupyr (SDHI), C: carbendazim

267 (benzimidazole) and P: prothioconazole-desthio (DMI). **(A)** The normalised spore concentration is the

268 spore concentration observed at the end of a cycle relative to that in the control line (*i.e.* a susceptible

269 population not exposed to fungicides). **(B)** Mean Malthusian growth. Results are normalised against the  
270 Malthusian growth of the control (histogram bars) and are presented with their standard deviations  
271 (upper and lower lines). Different letters indicate significant differences between groups ( $P < 0.05$ ).

272

273 The evolution of lines exposed to efficient-dose mixtures was highly heterogeneous. The BP  
274 mixture fully delayed resistance, as no resistance emerged in these lines after 10 cycles, as for  
275 the B lines. Dynamics differed highly significantly between BP and P ( $P < 1e^{-3}$ ) but dynamics  
276 between BP and B were similar ( $P = 0.56$ ). The BC mixture had an intermediate performance,  
277 significantly different from those of B and C ( $P < 1e^{-3}$  for both), with resistance emerging after  
278 six cycles (*i.e.* one cycle later than for direct exposure to C but before that for direct exposure  
279 to B) and a normalised spore concentration that reached 80% by cycle 10, when resistance was  
280 generalised in C lines. The CP mixture was not sustainable, as the emergence and generalisation  
281 of resistance at cycles 3 and 5, respectively, occurred more rapidly than in lines exposed to C  
282 or P alone (emergence of resistance at cycle 5 and generalisation at cycles 8 and 9, respectively)  
283 and resistance dynamics differed significantly from those for P and C alone ( $P < 1e^{-3}$  for both).  
284 The three-way mixture (BCP) yielded intermediate results, with resistance emerging and  
285 generalising more slowly than in lines exposed to the least durable mixture, CP (but this  
286 difference was not significant,  $P = 0.20$ ) although resistance did emerge eventually, by contrast  
287 to the BP mixture ( $P < 1e^{-3}$ ).

288 We compared the global increase in resistance, based on cycle-averaged Malthusian growth  
289 rates, which produced a similar ranking of these strategies (Figure 1B). The increase in  
290 resistance in BC lines was intermediate, significantly higher than that in B lines but lower than  
291 that in C lines ( $P < 0.05$ ). The increase in resistance in CP lines was similar to or significantly



292 greater than that in the corresponding single-fungicide lines. The performance of BP lines was  
293 not significantly different from that of B lines, which displayed the highest level of resistance  
294 durability. BCP lines were intermediate, with a performance not significantly different from that  
295 of the two least durable AI treatments.

296 CP, the least "durable" mixture, was the only mixture to display any evidence of synergism  
297 (non-significant) and was applied with an efficient dose lower than the sum of half the efficient  
298 doses of each component.

299

### 300 *Efficient-dose fungicide mixtures select for generalist and/or multiple resistance*

301 We determined the phenotypic resistance profile of each population in droplet tests  
302 performed at cycle 9 (Figure 2). As expected, the control lines displayed no resistance to any  
303 of the fungicide treatments tested in the droplet test. The lines exposed to single fungicides  
304 presented contrasting patterns of resistance. Those exposed to C had a unique, narrow  
305 resistance profile characterised by strong resistance to C (mean resistance score of 4, *i.e.* the  
306 maximal score) and moderate resistance to the BCP mixture (mean resistance score of 2). By  
307 contrast, lines exposed to P had specific profiles in each of the four repeats, all broader than  
308 that for lines exposed to C (on average, P lines were resistant to 3.25 of 8 discriminatory doses,  
309 whereas C lines were resistant to 2) and including various degrees of resistance to P and to CP,  
310 but also to tolnaftate (for 3 of 4 lines). Tolnaftate resistance is considered an indicator of  
311 multidrug resistance due to enhanced efflux in *Z. tritici* [21,25]. Such patterns are consistent  
312 with the evolution of multiple and/or generalist resistance mechanisms. Lines exposed to B, in

313 which no resistance had emerged, displayed no resistance in any of the modalities of the  
314 droplet test.

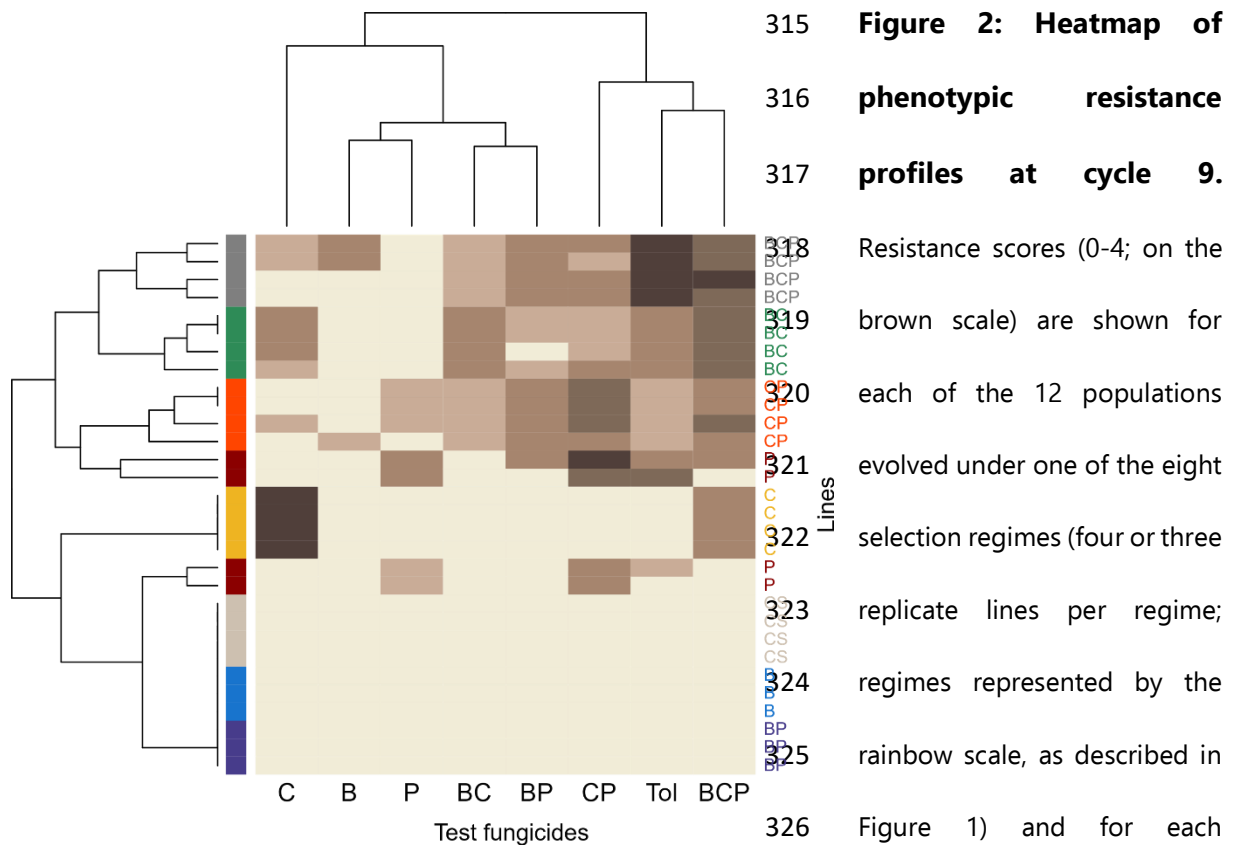

327 fungicide or mixture tested. Heatmaps were established on the basis of pairwise Euclidean distance.

328

329 The lines exposed to efficient-dose fungicide mixtures in which resistance had emerged (BC,  
330 CP and BCP) had broader resistance profiles than those exposed to a single AI, even P. Indeed,  
331 they were, on average, resistant to 2.3 times more testing modalities than those exposed to a  
332 single AI ( $P < 1e^{-4}$ ), but to a lesser extent, with scores 0.8 times lower for selection regimes  
333 against which they were resistant. These lines were resistant to their selection mixture, to  
334 various degrees, but also to the other three mixtures and to tolnaftate, especially for BCP lines,  
335 which had the highest possible score for resistance to tolnaftate. This, again, suggests that  
336 multiple and/or generalist resistance was evolving in these lines. However, these lines were not

337 necessarily resistant to the efficient dose of the components of the selection mixture used  
338 alone: BC lines were resistant to C but not B; CP lines were mostly resistant to P but remained  
339 susceptible to C; and half the BCP population displayed resistance to B and C whereas the other  
340 half presented no resistance to any single AI. The lines exposed to BP, in which no resistance  
341 had emerged, also displayed no resistance in the droplet tests.

342

### 343 *Reduced doses of single AIs still select for resistance*

344 As expected, over the course of the experiment, the control of *Z. tritici* was weaker in  
345 the lines exposed to reduced doses than in those exposed to the efficient dose of the same  
346 fungicide (Figure 3). In particular, resistance to B emerged in populations subjected to  
347 treatment with reduced doses of this fungicide, whereas the emergence of such resistance was  
348 prevented by use of the efficient dose. For each AI, mean Malthusian growth was significantly  
349 greater in reduced-dose lines than in efficient-dose lines ( $P=0.04$  and  $P=0.003$ , for  $P_{r1}$  and  $P_{r2}$ ,  
350 respectively, versus P, and  $P < 1e^{-4}$ , for all pairwise comparisons between efficient and reduced  
351 doses of B and C). Surprisingly,  $C_r$  lines exposed to reduced doses of C (*i.e.* 0.4 and 0.45 of the  
352 efficient dose in the preliminary data), initially displayed a similar level of control to lines  
353 exposed to the full efficient dose (Table 1). Nevertheless, control of the fungus was weaker in  
354 these lines, as expected, from the second cycle (Figure 3). The greater continuous increase in  
355 spore concentration over time cycles indicates that reduced-dose regimes select for resistance,  
356 in addition to providing poorer control over fungal populations. However, it was not possible  
357 to test the effect of dose reduction on resistance selection, because lines exposed to full or  
358 reduced doses were not subject to the same treatment intensity, making it impossible to  
359 dissociate resistance selection from growth control.

360

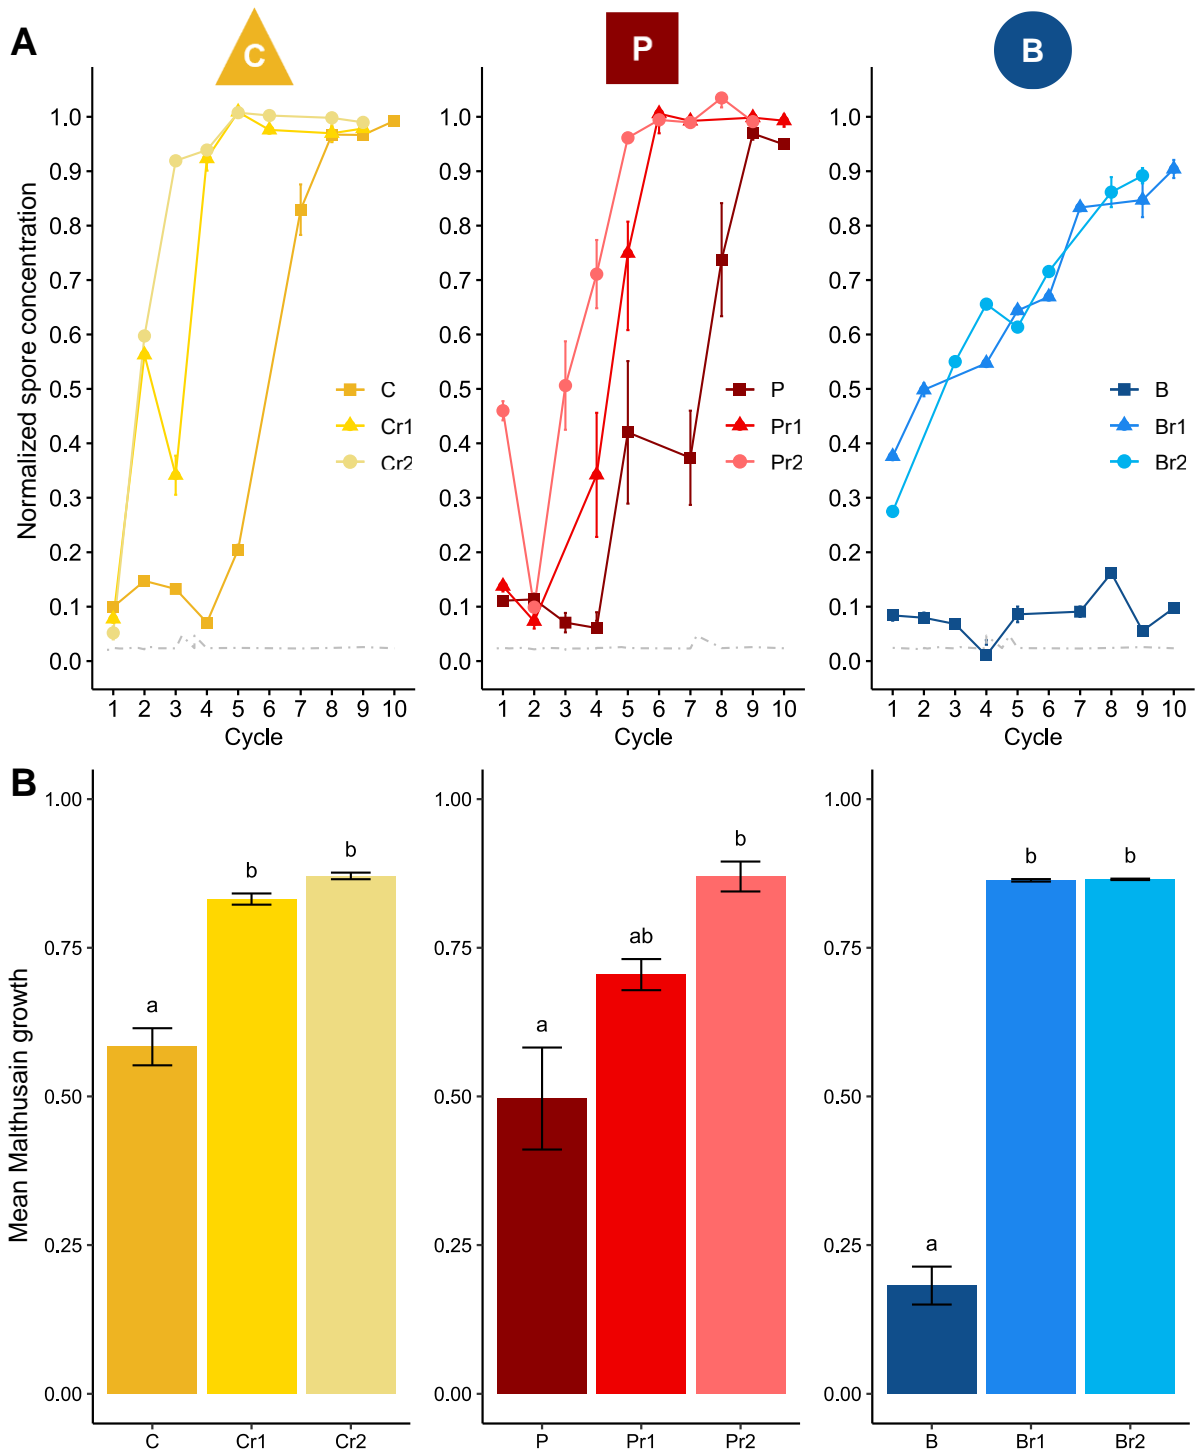

361

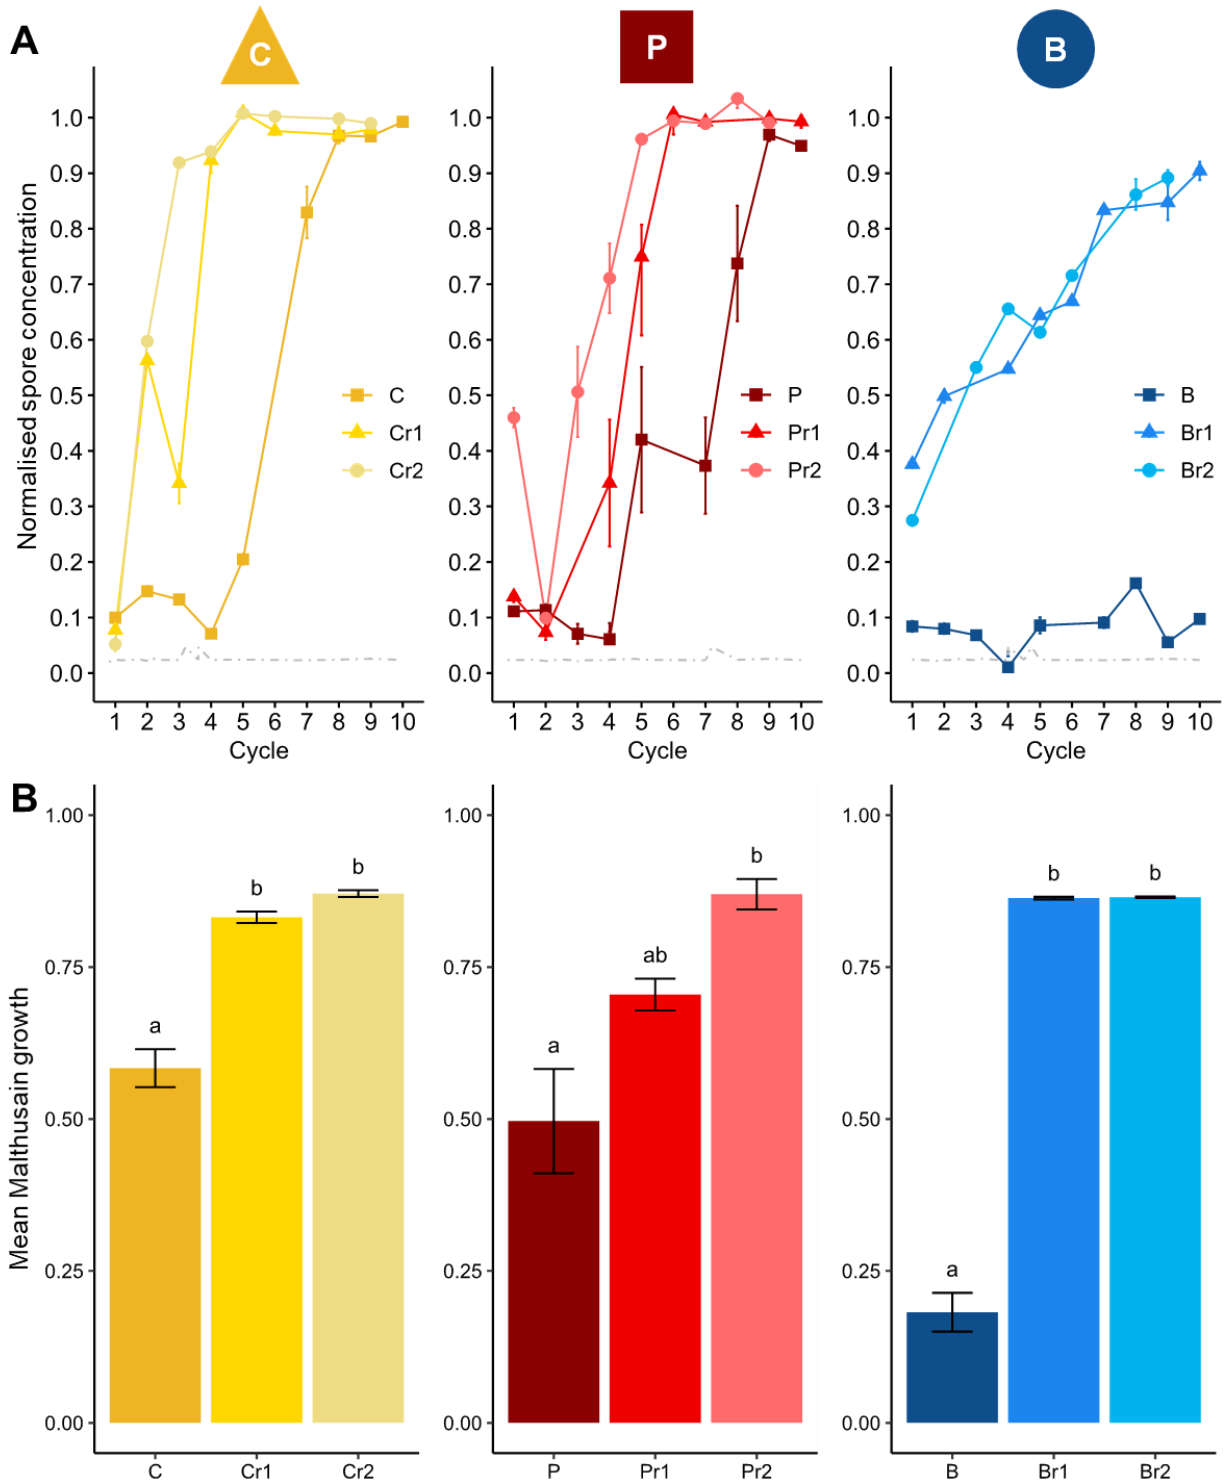

362

363 **Figure 3: Dynamics of resistance evolution in the lines exposed to a single fungicide at**

364 **the full efficient dose or a reduced dose.** Each column represents results for an AI used at its EC<sub>90</sub>

365 selection dose or at two reduced doses, corresponding to a fraction of this EC<sub>90</sub> (Table 1). B:

366 benzovindiflupyr (SDHI), C: carbendazim (benzimidazole) and P: prothioconazole-desthio (DMI). **(A)** The

367 normalised spore concentration is the spore concentration observed at the end of a cycle divided by the

368 spore concentration in the control line (*i.e.* a susceptible population not exposed to fungicides). **(B)**  
369 Mean Malthusian growth. Results are normalised against the Malthusian growth of the control  
370 (histogram bars) and are presented with their standard deviations (upper and lower lines). Different  
371 letters indicate significant differences between groups ( $P < 0.05$ ).

372

### 373 *Reduced doses of fungicides also select for generalist phenotypes*

374 Heatmaps of the phenotypic resistance profiles confirmed that reduced doses of B, C or P  
375 selected for resistance (Figure 4). Lines subjected to selection with reduced doses of B or C and  
376 more than half of those exposed to reduced doses of P (five of eight) were resistant to the  
377 fungicide used for selection at its efficient dose. The resistance profiles selected at reduced  
378 doses were broader than or different from those selected at the efficient dose of the same  
379 fungicide. For C, the efficient-dose regime selected a unique resistance profile with high  
380 resistance to C and moderate resistance to BCP, whereas the reduced-dose regime selected  
381 for generally weaker resistance, but with additional resistance to tolnaftate. For P, the efficient-  
382 dose regime selected for resistance to P and CP, and also to tolnaftate, in three of four lines.  
383 The reduced-dose P regime selected for BP and BCP resistance (except for one line), but only  
384 half the lines were resistant to CP or P and all lines were susceptible to tolnaftate. For fungicide  
385 B, the reduced-dose regime mostly selected for resistances to B, BP and BCP that we were  
386 unable to compare with efficient-dose regime-induced resistance, because no resistance  
387 emerged under efficient-dose treatment.

388

389 *Resistance profiles are determined by the balance between selection*  
390 *heterogeneity and reduction of the dose of single AIs in efficient-dose mixtures*

391 Resistance spectra differed in terms of the number of fungicides for which resistance  
392 was detected and the occurrence of these resistances in the replicates of the different selection  
393 regimes (Figure 5). The resistance spectrum of BC lines, including six resistances, corresponded  
394 almost exactly to the union of the resistance spectra of B<sub>r</sub> and C<sub>r</sub> (with an extra resistance to  
395 CP and an absent resistance to B). By contrast, the cumulative resistance spectra of B and C  
396 included only two resistances. The CP lines had a similar profile, because the CP resistance  
397 spectrum included a common resistance to BC and BP observed only for reduced-dose  
398 regimens of C and P but not for efficient-dose regimes. The resistance spectrum of BCP lines  
399 was also better explained by the spectra of the reduced-dose B, C and P regimes, which  
400 contained more resistances to BC, BP and B than the efficient-dose regime spectra.

401

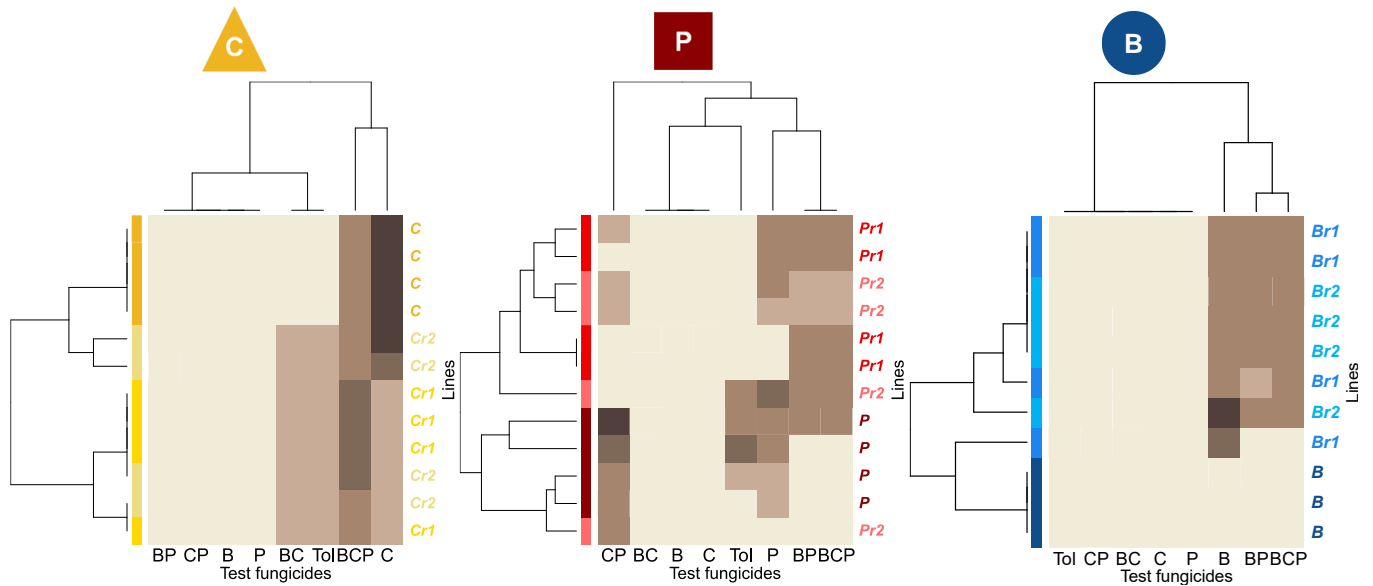

402

403 **Figure 4: Heatmaps of phenotypic resistance profiles at cycle 9.** The resistance rating scores  
404 (0-4; represented by the brown scale) are shown for each of the 12 lines evolved under 3 possible  
405 selection doses of single-AI treatments (4 replicate lines per dose) and for each fungicide or mixture  
406 tested. From left to right, the single AI used is B (benzovindiflupyr; SDHI), C (carbendazim;  
407 benzimidazoles) and P (prothioconazole-desthio; P). Heatmaps were established with the pairwise  
408 Euclidean distance.



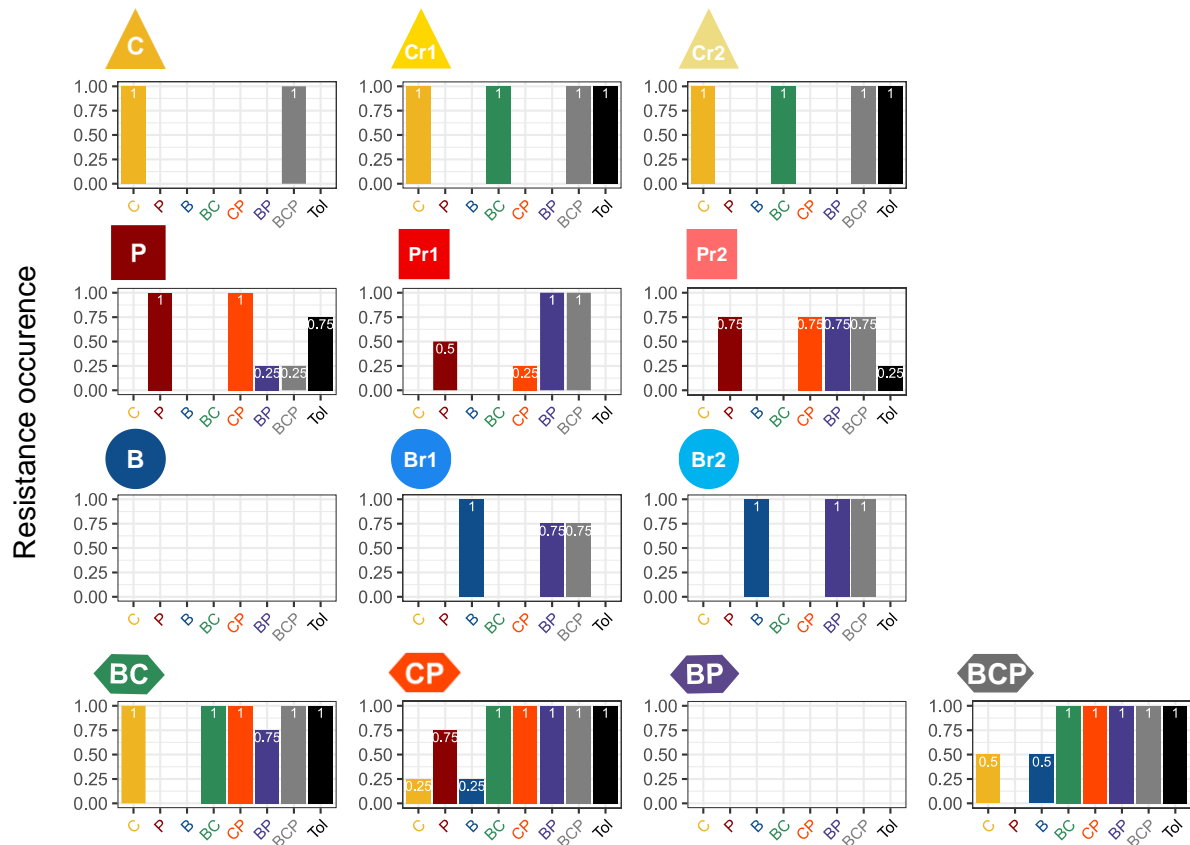

409

410 **Figure 6: Occurrence of resistance during evolution under each selection regime.** The  
 411 histograms show the occurrence of resistance within a line for each modality in the droplet test. For  
 412 example, a score of 0.25 means that one of the four replicated lines of this selection regime had a  
 413 resistance score above zero.

414

415 In PCA of the resistance profiles established for each line, the first axis corresponded principally  
 416 to resistance to tolnaftate and BCP, and secondarily to resistance to the two-compound  
 417 mixtures (Figure 6). This first axis showed that efficient-dose mixtures often selected higher  
 418 intensity generalist resistance. Indeed, to the left of this axis were lines with narrower resistance  
 419 spectra (*i.e.* selected with efficient-dose single-AI regimes). Towards the centre of the PCA were  
 420 lines with low resistance to tolnaftate and BCP (*e.g.* Cr1, Cr2), and, to the right, were lines with  
 421 higher rates of resistance to tolnaftate and BCP (all treated with effective-dose mixtures). An

422 analysis of the occurrence of tolnaftate resistance revealed a significant effect of mixture on  
423 the selection of resistance to this fungicide, with significantly higher scores for two- and three-  
424 way mixtures than for the corresponding AIs used alone ( $P=0.19$  and  $P=0.002$ , respectively).  
425 This analysis also revealed a positive significant effect on the selection of generalist resistance  
426 for lines exposed to reduced doses of C ( $P=0.0059$ ). No negative or highly positive cross-  
427 resistance was observed between the different MoAs (*i.e.* the correlations between scores for  
428 different fungicide testing modalities ranged between 0.14 and 0.66; SI Figure 1).  
429 The generalist resistance profiles selected in efficient-dose mixtures thus result from both the  
430 multiplicity of selection pressures exerted by the mixtures and the reduction of the dose of  
431 each of their components.

432

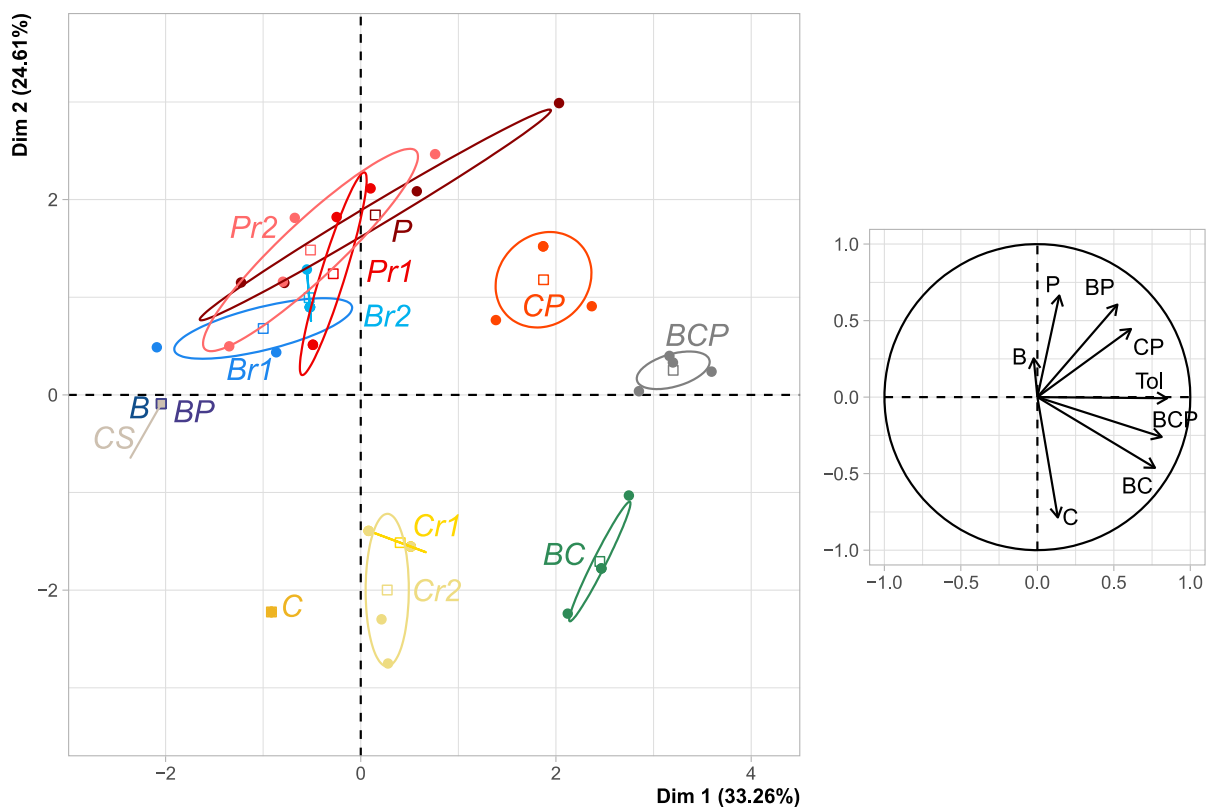

433

434 **Figure 6: Phenotypic resistance profiles for all lines at the end of the experiment.** The PCA  
435 was structured by generalist resistance, detected on the basis of resistance to tolnaftate and the BCP  
436 mixture.

437

## 438 DISCUSSION

439 We investigated the effect of efficient-dose mixtures on the emergence and selection  
440 of fungicide resistance, by subjecting multiple lines of a susceptible isolate of *Z. tritici* to  
441 fungicides representative of three modes of action, applied either singly at the efficient dose  
442 or at a fraction of this dose ( $EC_{50}$ ), or as two- or three-component mixtures. Efficient-dose  
443 applications of single AIs or mixtures resulted in the same treatment efficacy ( $EC_{90}$ ). The effect  
444 of efficient-dose mixtures on resistance dynamics differed considerably between mixtures,  
445 according to their components: such mixtures were either as durable as the best mixture  
446 component used alone, or worse than all AIs used alone. Moreover, efficient-dose mixtures  
447 favoured generalist resistance phenotype profiles, with all lines subjected to such regimes  
448 displaying resistance to all mixtures, but also to tolnaftate, an indicator of multidrug resistance  
449 (MDR), a generalist resistance mechanism already described in field strains of *Z. tritici*. The  
450 resistance profiles characterised in lines treated with efficient-dose mixtures resulted from the  
451 combined selection pressures exerted by each of the components of the mixture at their  
452 reduced doses. Indeed, these profiles were similar to the union of profiles obtained after  
453 exposure to reduced-doses of the corresponding single AIs, but with higher scores recorded  
454 for modalities associated with generalist resistance (*i.e.* resistance to tolnaftate and mixtures).

455 The design of this experiment was similar to that used in a previous study [22] using the same  
456 AIs but addressing the issue of the sustainability of alternation strategies. Here, the ranking of

457 times to resistance emergence did not reflect the assumed hierarchy of the intrinsic risks of  
458 resistance associated with benzimidazoles (high; C), SDHIs (moderate to high; B) and DMIs  
459 (moderate; P) [26]. Indeed, resistance emerged first in C lines and later in P lines, but was never  
460 selected in B lines. This discrepancy may reflect differences in temperature and humidity  
461 between the two evolution experiments, or most probably differences in treatment efficacy  
462 (particularly in the use of EC<sub>90</sub> rather than EC<sub>95</sub>, leading to a substantial difference in the  
463 selection doses for B and C). We therefore considered that the lines in this experiment, which  
464 evolved in the same environment, were comparable, but we focused our conclusions on the  
465 effects of the C and P AIs and did not interpret our results in terms of intrinsic risks.

466

467 *Mixtures were no more durable than single fungicides applied at the efficient*  
468 *dose.*

469 We observed highly contrasting resistance dynamics, despite similar initial disease  
470 control, depending on the strategy (single or two- or three-way mixtures) and the components  
471 of mixtures. Our findings demonstrate that mixture-based strategies do not systematically  
472 provide better resistance control than single-fungicide treatments. This result is contrary to the  
473 prevailing view and recommendations concerning mixtures [3,4,27]. Indeed, previous studies  
474 have reported an ability of mixture-based strategies to delay the emergence [11] and selection  
475 [6] of resistance to a high-resistance risk fungicide, increasing the effective life of this fungicide.  
476 However, significant differences between this and previous studies may account for the  
477 divergent conclusions.

478 First, we studied efficient-dose mixtures, as suggested in a previous study [28], based on the  
479 argument that mixtures could be used at lower doses, and at the minimal dose still giving  
480 effective control in particular, to decrease the selection of resistance. Little attention has, as yet,  
481 focused on half-dose mixtures [13], and almost all the studies to date on mixtures have  
482 considered full-dose mixtures (but see [14] for an exception). We studied the reported  
483 “redundant-killing” effect of mixtures and disentangled it from any additive or synergistic  
484 effects of combinations of AIs, by exposing all lines to treatments of similar efficacy. We then  
485 modified the fraction of the efficient dose of each component. The CP selection regime  
486 included the two fungicides, each at 0.4 times their  $EC_{90}$ , whereas the doses of the other  
487 mixtures included components at more than half the  $EC_{90}$  of their component (or one third of  
488 the dose for BCP). Considering half-doses might have modified the ranking of mixture  
489 strategies. For example, the CP selection regime, which was the least sustainable for the  
490 efficient-dose mixture ( $0.4 \times EC_{90}$ - dose mixture) would have included higher doses, possibly  
491 resulting in greater durability, whereas the other mixtures would have included lower doses,  
492 possibly resulting in lower durability.

493 Second, we used a naive ancestral population, susceptible to all fungicides, whereas most  
494 studies have focused on the selection phase of resistance dynamics, *i.e.* after resistance to at  
495 least one of the components has already emerged.

496 Third, most studies have focused on the evolution of resistance to only one of the components  
497 of the mixture, generally the fungicide considered to be at the highest risk of resistance  
498 development. Resistance to the other components of the mixture is often assumed to be  
499 insignificant, despite its probable contribution to the gradual growth of the population, and  
500 generalist mechanisms are neglected. A previous review [3] identified only four papers

501 considering resistance to both components of two-compound mixtures. Our findings can, thus,  
502 be interpreted in terms of the overall durability of the mixture, rather than just the effect of the  
503 mixture in delaying a specific resistance phenotype. Finally, we performed an experiment in  
504 which it was possible to study resistance dynamics without making *a priori* assumptions about  
505 resistance phenotypes or the mechanisms likely to be selected [29–31], whereas previous  
506 theoretical studies were limited to the consideration of one or a few resistance phenotypes.  
507 Our results support the conclusions of the empirical study by Mavroei and Shaw (2006)  
508 suggesting a strong dependence of the benefit of mixtures on the specific combinations of  
509 their components, which required experimental demonstration.

510

### 511 *Mixtures favour generalist resistance in a phytopathogenic fungus*

512 We found that mixtures favoured the selection of broad resistance phenotype profiles,  
513 consistent with multiple resistance and/or generalist mechanisms. Indeed, lines evolved under  
514 mixture regimes often displayed broad resistance spectra than those exposed to a single AI,  
515 with lower resistance intensity, and growth on tolnaftate. As tolnaftate resistance is considered  
516 to be an indicator of MDR [25], we assume that generalist resistance was more likely to occur  
517 than multiple specific resistances, although we cannot rule out the possibility of such specialist  
518 resistance. Indeed, both types of resistance may coexist within an individual or within a  
519 population, as previously described [33] in the “bet-hedging” hypothesis, according to which,  
520 in an isogenic population, differently specialized phenotypes with fitnesses varying between  
521 conditions, may co-exist in a dynamic equilibrium in a heterogeneous environment. Genetic  
522 analysis (*e.g.* of the promoter of the *mfs1* gene, variants of which are associated with MDR in

523 field isolates of *Z. tritici*; [34]) could be performed to determine the resistance structure of  
524 evolved populations, although non-target-site resistance could also be acquired by epigenetic  
525 mechanisms [35].

526 Our findings, indicating that the use of mixtures favours generalist resistance, is consistent with  
527 the findings of at least two other studies, [36] and [15], for herbicide mixtures and another  
528 study, [37], on combinations of antibiotics. MDR is an increasing problem worldwide [38].  
529 Greater attention should, therefore, be paid to this trade-off in the design of resistance  
530 management strategies, by including considerations relating to the management of non-target  
531 site resistance, for example, as suggested in two previous studies on SDHI fungicides, [39] and  
532 [40].

533

534 *Resistance profiles are shaped by dose variation and should therefore be*  
535 *considered in management strategies*

536 In resistance management strategies for fungi, the question of dose rate has generally  
537 focused on variation in resistance dynamics: the time to resistance emergence or the selection  
538 rate [3,6,11,12]. Our experiment did not resolve this debate, because the growth of susceptible  
539 and resistant variants was confounded in observations of fungal growth, and because the  
540 reduced doses considered here were too low for any realistic description of resistance  
541 management strategies with sufficient disease control. However, it did tackle the question of  
542 the dose rate from a new standpoint, by considering the qualitative outcome of selection rather  
543 than just the dynamics of resistance.

544 We observed that strains resistant to the efficient dose of B, C or P could be selected with  
545 reduced doses of the same fungicides, even for the lines exposed to benzovindiflupyr (B), for  
546 which resistance never emerged at full dose. This is consistent with previous observations for  
547 antibiotics [31,41,42] and herbicides [43]. Indeed, low-dose treatment leads to the higher  
548 frequency selection of resistance mutations with a small effect size, resulting in high-level  
549 resistance [43].

550

551 The presence of specific resistances in lines treated with reduced-dose regimes suggests that  
552 dose mitigation also favours selection for generalist mechanisms. Indeed, resistances to  
553 tolnaftate and the BCP mixture were found in lines exposed to reduced doses of B and P,  
554 respectively, but not in lines treated with full efficient doses of the same fungicides. These  
555 results are consistent with those of many previous studies, in domains other than plant  
556 pathology, in which low doses have been shown to select for off-target mutations [44–46] and  
557 for polygenic resistance mechanisms [44,47] more likely to result in multiple or generalist  
558 resistance (see Raymond (2019) for a review).

559

560 The selection exerted by reduced doses of fungicides may also shape the resistance profiles of  
561 lines exposed to efficient-dose mixtures, which are more similar to the union of resistance  
562 profiles of lines exposed to reduced doses of the components of mixture than to the union of  
563 resistance profiles for lines exposed to efficient doses. In particular, resistance to tolnaftate was  
564 observed in lines exposed to reduced doses of C (but not in lines exposed to the efficient dose)  
565 and in all lines exposed to efficient-dose mixtures including C. As highlighted in a previous  
566 study [16] on antibiotics, low doses should be considered with caution in resistance strategy



567 management, as they do not prevent resistance and could lead to the evolution of generalist  
568 resistance, even in mixtures.

569

### 570 *Experimental evolution: a useful tool for comparing strategies*

571 The use of an experimental evolution framework made it possible to subject  
572 populations to resistance management strategies with various degrees of selection  
573 heterogeneity and to compare the performance of different strategies in standardised  
574 conditions. In this controlled environment, it was possible to untangle and assess the  
575 performance of several drivers of mixture and dose-reduction strategies, which would have  
576 been difficult to achieve in field experiments. The observation of selected resistance profiles  
577 was also an advantage over model studies. Despite these multiple advantages, the experiment  
578 remained tricky to handle, resulting in the study of only a limited number of strategies. Further  
579 studies testing other AIs, different dose ranges for fungicides used alone or in mixtures and  
580 double the efficient dose are required to consolidate our conclusions, particularly as concerns  
581 the effect of dose in mixtures. In terms of applications, a better understanding of the predictive  
582 capacities of such experiments (*e.g.* by relating growth dynamics and resistance profiles to  
583 disease control and in-field resistance frequency) is likely to be the key to designing resistance  
584 strategies tailored to the intrinsic properties of pathogens and fungicides. Finally, we tested  
585 our strategies on naive populations, susceptible to all fungicides. Applying this approach to  
586 populations in which initial resistance is present might make it possible to offer farmers  
587 additional advice, as contrasting resistance statuses have been reported in monitoring studies  
588 [20].

589

## 590 Conclusion

591 Our results demonstrate that the use of mixtures cannot be considered a universal  
592 strategy for resistance management. At the minimal dose able to control the disease, the use  
593 of a mixture against a naive population may decrease durability and increase generalist  
594 resistance relative to single fungicide treatments of similar efficacy. However, efficient-dose  
595 mixtures, provided that they have appropriate components, could potentially provide disease  
596 and resistance control as effective as that achieved with single-fungicide treatments, at a lower  
597 environmental and economic cost. It is therefore essential to take into account the specificities  
598 of the targeted pathogens, their interactions with fungicides and the interactions between  
599 fungicides, as demonstrated here, together with the frequency and type of resistance already  
600 present in the population, in the design of sustainable resistance management strategies.  
601 Resistance management remains a key challenge for the development of a more sustainable  
602 agriculture. Experimental evolution is a highly promising tool that can help us to achieve this  
603 goal, as a useful complement to theoretical studies and field monitoring.

604

## 605 Acknowledgments

606 AB was supported by a PhD studentship funded by the French Ministry of Higher  
607 Education, Research and Innovation, and Syngenta France, through the CIFRE program,  
608 supervised by the National Association for Research and Technology (ANRT). This work was  
609 supported by the Plant Health Division of INRAE through the STRATAGEME project.

610 We thank Fabrice Blanc for facilitating the administrative organisation of this PhD studentship,  
611 and Dr. Stefano Torriani, for his constructive scientific input throughout the project. We would  
612 also like to thank Dr. Stephanie Bedhomme and Dr. Mato Lagator for their sound comments  
613 about our findings.

## 614 Author contributions

615 ASW and FC conceived and designed the study, with contributions from AD and AB. AB  
616 performed the experimental evolution experiment. AB and FC performed the statistical analysis,  
617 with contributions from ASW and AD. The paper was written by AB and FC, with significant  
618 contributions from ASW and AD.

## 619 Conflicts of Interest

620 The authors declare no conflicts of interest.

## 621 References

- 622 1. Gould, F.; Brown, Z.S.; Kuzma, J. Wicked Evolution: Can We Address the Sociobiological  
623 Dilemma of Pesticide Resistance? *Science* **2018**, *360*, 728–732, doi:10.1126/science.aar3780.
- 624 2. Fisher, M.C.; Hawkins, N.J.; Sanglard, D.; Gurr, S.J. Worldwide Emergence of Resistance to  
625 Antifungal Drugs Challenges Human Health and Food Security. *Science* **2018**, *360*, 739–742,  
626 doi:10.1126/science.aap7999.
- 627 3. van den Bosch, F.; Paveley, N.; van den Berg, F.; Hobbelen, P.; Oliver, R. Mixtures as a Fungicide  
628 Resistance Management Tactic. *Phytopathology* **2014**, *104*, 1264–1273, doi:10.1094/PHYTO-04-  
629 14-0121-RVW.
- 630 4. van den Bosch, F.; Oliver, R.; Berg, F. van den; Paveley, N. Governing Principles Can Guide  
631 Fungicide-Resistance Management Tactics. *Annu. Rev. Phytopathol.* **2014**, *52*, 175–195,  
632 doi:10.1146/annurev-phyto-102313-050158.
- 633 5. Brent, K.J.; Hollomon, D.W. *Fungicide Resistance in Crop Pathogens: How Can It Be Managed?*;  
634 FRAC Monograph; GIFAP: Brussels, 2007; ISBN 978-90-72398-07-9.
- 635 6. Hobbelen, P.H.F.; Paveley, N.D.; van den Bosch, F. Delaying Selection for Fungicide Insensitivity  
636 by Mixing Fungicides at a Low and High Risk of Resistance Development: A Modeling Analysis.  
637 *Phytopathology* **2011**, *101*, 1224–1233, doi:10.1094/PHYTO-10-10-0290.
- 638 7. Hollomon, D.W. Fungicide Resistance: Facing the Challenge ; a Review. *Plant Prot. Sci.* **2015**, *51*,  
639 170–176, doi:10.17221/42/2015-PPS.

- 640 8. Staub, T. Fungicide Resistance: Practical Experience with Antiresistance Strategies and the Role  
641 of Integrated Use. *Annu. Rev. Phytopathol.* **1991**, *29*, 421–442,  
642 doi:10.1146/annurev.py.29.090191.002225.
- 643 9. Milgroom, M.G.; Fry, W.E. A Simulation Analysis of the Epidemiological Principles for Fungicide  
644 Resistance Management in Pathogen Populations. *Phytopathology* **1988**, *78*, 565,  
645 doi:10.1094/Phyto-78-565.
- 646 10. van den Bosch, F.; Paveley, N.; Shaw, M.; Hobbelen, P.; Oliver, R. The Dose Rate Debate: Does  
647 the Risk of Fungicide Resistance Increase or Decrease with Dose? *Plant Pathol.* **2011**, *60*, 597–  
648 606, doi:10.1111/j.1365-3059.2011.02439.x.
- 649 11. Hobbelen, P.H.F.; Paveley, N.D.; van den Bosch, F. The Emergence of Resistance to Fungicides.  
650 *PLoS ONE* **2014**, *9*, e91910, doi:10.1371/journal.pone.0091910.
- 651 12. Mikaberidze, A.; Paveley, N.; Bonhoeffer, S.; van den Bosch, F. Emergence of Resistance to  
652 Fungicides: The Role of Fungicide Dose. *Phytopathology* **2017**, *107*, 545–560,  
653 doi:10.1094/PHYTO-08-16-0297-R.
- 654 13. REX Consortium Heterogeneity of Selection and the Evolution of Resistance. *Trends Ecol. Evol.*  
655 **2013**, *28*, 110–118, doi:10.1016/j.tree.2012.09.001.
- 656 14. Elderfield, J.A.D.; Lopez-Ruiz, F.J.; van den Bosch, F.; Cunniffe, N.J. Using Epidemiological  
657 Principles to Explain Fungicide Resistance Management Tactics: Why Do Mixtures Outperform  
658 Alternations? *Phytopathology*® **2018**, *108*, 803–817, doi:10.1094/PHYTO-08-17-0277-R.
- 659 15. Lagator, M.; Vogwill, T.; Mead, A.; Colegrave, N.; Neve, P. Herbicide Mixtures at High Doses  
660 Slow the Evolution of Resistance in Experimentally Evolving Populations of *Chlamydomonas*  
661 *Reinhardtii*. *New Phytol.* **2013**, *198*, 938–945, doi:10.1111/nph.12195.
- 662 16. Raymond, B. Five Rules for Resistance Management in the Antibiotic Apocalypse, a Road Map  
663 for Integrated Microbial Management. *Evol. Appl.* **2019**, *12*, 1079–1091,  
664 doi:10.1111/eva.12808.
- 665 17. Mikaberidze, A.; McDonald, B. Fitness cost of resistance: impact on management. In; 2015; pp.  
666 77–89 ISBN 978-4-431-55641-1.
- 667 18. Torriani, S.F.F.; Melichar, J.P.E.; Mills, C.; Pain, N.; Sierotzki, H.; Courbot, M. *Zymoseptoria*  
668 *Tritici*: A Major Threat to Wheat Production, Integrated Approaches to Control. *Fungal Genet.*  
669 *Biol.* **2015**, *79*, 8–12, doi:10.1016/j.fgb.2015.04.010.
- 670 19. Fones, H.; Gurr, S. The Impact of Septoria Tritici Blotch Disease on Wheat: An EU Perspective.  
671 *Fungal Genet. Biol.* **2015**, *79*, 3–7, doi:10.1016/j.fgb.2015.04.004.
- 672 20. Garnault, M.; Duplaix, C.; Leroux, P.; Couleaud, G.; Carpentier, F.; David, O.; Walker, A.-S.  
673 Spatiotemporal Dynamics of Fungicide Resistance in the Wheat Pathogen *Zymoseptoria Tritici*  
674 in France. *Pest Manag. Sci.* **2019**, *75*, 1794–1807, doi:10.1002/ps.5360.
- 675 21. Omrane, S.; Sghyer, H.; Audéon, C.; Lanen, C.; Duplaix, C.; Walker, A.-S.; Fillinger, S. Fungicide  
676 Efflux and the MgMFS1 Transporter Contribute to the Multidrug Resistance Phenotype in *Z*  
677 *ymoseptoria Tritici* Field Isolates: Fungicide Efflux & *MgMFS 1* Contribute to MDR in *Z. Tritici*.  
678 *Environ. Microbiol.* **2015**, *17*, 2805–2823, doi:10.1111/1462-2920.12781.
- 679 22. Ballu, A.; Despréaux, P.; Duplaix, C.; Dérédec, A.; Carpentier, F.; Walker, A.-S. I Alternate  
680 Therefore I Generalize: How the Intrinsic Resistance Risk of Fungicides Counterbalances Their  
681 Durability. *bioRxiv* **2021**, doi:10.1101/2021.07.11.451819.
- 682 23. Vogwill, T.; Lagator, M.; Colegrave, N.; Neve, P. The Experimental Evolution of Herbicide  
683 Resistance in *Chlamydomonas Reinhardtii* Results in a Positive Correlation between Fitness in  
684 the Presence and Absence of Herbicides. *J. Evol. Biol.* **2012**, *25*, 1955–1964, doi:10.1111/j.1420-  
685 9101.2012.02558.x.
- 686 24. Gisi, U.; Binder, H.; Rimbach, E. Synergistic Interactions of Fungicides with Different Modes of  
687 Action. *Trans. Br. Mycol. Soc.* **1985**, *85*, 299–306, doi:10.1016/S0007-1536(85)80192-3.
- 688 25. Leroux, P.; Walker, A.-S. Multiple Mechanisms Account for Resistance to Sterol 14 $\alpha$ -  
689 Demethylation Inhibitors in Field Isolates of *Mycosphaerella Graminicola*. *Pest Manag. Sci.*  
690 **2011**, *67*, 44–59, doi:10.1002/ps.2028.

- 691 26. Brent, K.J.; Hollomon, D.W. Fungicide Resistance: The Assessment of Risk. *Fungic. Resist.* **2007**,  
692 28.
- 693 27. FRAC FRAC Recommendations for Fungicide Mixtures 2010.
- 694 28. Shaw, M.W. Theoretical Analysis of the Effect of Interacting Activities on the Rate of Selection  
695 for Combined Resistance to Fungicide Mixtures. *Crop Prot.* **1993**, *12*, 120–126,  
696 doi:10.1016/0261-2194(93)90138-9.
- 697 29. Bailey, S.F.; Bataillon, T. Can the Experimental Evolution Programme Help Us Elucidate the  
698 Genetic Basis of Adaptation in Nature? *Mol. Ecol.* **2016**, *25*, 203–218, doi:10.1111/mec.13378.
- 699 30. Yi, X. Experimental Evolution and Proximate Mechanisms in Biology. *Synth. Syst. Biotechnol.*  
700 **2017**, *2*, 253–258, doi:10.1016/j.synbio.2017.10.004.
- 701 31. Remigi, P.; Masson-Boivin, C.; Rocha, E.P.C. Experimental Evolution as a Tool to Investigate  
702 Natural Processes and Molecular Functions. *Trends Microbiol.* **2019**, *27*, 623–634,  
703 doi:10.1016/j.tim.2019.02.003.
- 704 32. Mavroei, V.I.; Shaw, M.W. Effects of Fungicide Dose and Mixtures on Selection for Triazole  
705 Resistance in *Mycosphaerella Graminicola* under Field Conditions. *Plant Pathol.* **2006**, *55*, 715–  
706 725, doi:10.1111/j.1365-3059.2006.01441.x.
- 707 33. van den Bergh, B.; Swings, T.; Fauvert, M.; Michiels, J. Experimental Design, Population  
708 Dynamics, and Diversity in Microbial Experimental Evolution. *Microbiol. Mol. Biol. Rev.* **2018**,  
709 *82*, doi:10.1128/MMBR.00008-18.
- 710 34. Omrane, S.; Audéon, C.; Ignace, A.; Duplaix, C.; Aouini, L.; Kema, G.; Walker, A.-S.; Fillinger, S.  
711 Plasticity of the MFS1 Promoter Leads to Multidrug Resistance in the Wheat Pathogen  
712 *Zymoseptoria Tritici*. **2017**, *2*, 18.
- 713 35. Hu, M.; Chen, S. Non-Target Site Mechanisms of Fungicide Resistance in Crop Pathogens: A  
714 Review. *Microorganisms* **2021**, *9*, 502, doi:10.3390/microorganisms9030502.
- 715 36. Comont, D.; Lowe, C.; Hull, R.; Crook, L.; Hicks, H.L.; Onkokesung, N.; Beffa, R.; Childs, D.Z.;  
716 Edwards, R.; Freckleton, R.P.; et al. Evolution of Generalist Resistance to Herbicide Mixtures  
717 Reveals a Trade-off in Resistance Management. *Nat. Commun.* **2020**, *11*, 3086,  
718 doi:10.1038/s41467-020-16896-0.
- 719 37. Vestergaard, M.; Paulander, W.; Marvig, R.L.; Clasen, J.; Jochumsen, N.; Molin, S.; Jelsbak, L.;  
720 Ingmer, H.; Folkesson, A. Antibiotic Combination Therapy Can Select for Broad-Spectrum  
721 Multidrug Resistance in *Pseudomonas Aeruginosa*. *Int. J. Antimicrob. Agents* **2016**, *47*, 48–55,  
722 doi:10.1016/j.ijantimicag.2015.09.014.
- 723 38. Kaye, K.S.; Kaye, D. Multidrug-Resistant Pathogens: Mechanisms of Resistance and  
724 Epidemiology. *Curr. Infect. Dis. Rep.* **2000**, *2*, 391–398, doi:10.1007/s11908-000-0065-1.
- 725 39. Mäe, A.; Fillinger, S.; Sooväli, P.; Heick, T.M. Fungicide Sensitivity Shifting of *Zymoseptoria Tritici*  
726 in the Finnish-Baltic Region and a Novel Insertion in the MFS1 Promoter. *Front. Plant Sci.* **2020**,  
727 *11*, 385, doi:10.3389/fpls.2020.00385.
- 728 40. Yamashita, M.; Fraaije, B. Non-Target Site SDHI Resistance Is Present as Standing Genetic  
729 Variation in Field Populations of *Zymoseptoria Tritici*: Non-Target Site SDHI Resistance in  
730 *Zymoseptoria Tritici*. *Pest Manag. Sci.* **2018**, *74*, 672–681, doi:10.1002/ps.4761.
- 731 41. Busi, R.; Gaines, T.A.; Walsh, M.J.; Powles, S.B. Understanding the Potential for Resistance  
732 Evolution to the New Herbicide Pyroxasulfone: Field Selection at High Doses versus Recurrent  
733 Selection at Low Doses: Resistance Evolution by High- and Low-Dose Selection. *Weed Res.* **2012**,  
734 *52*, 489–499, doi:10.1111/j.1365-3180.2012.00948.x.
- 735 42. Gullberg, E.; Cao, S.; Berg, O.G.; Ilbäck, C.; Sandegren, L.; Hughes, D.; Andersson, D.I. Selection  
736 of Resistant Bacteria at Very Low Antibiotic Concentrations. *PLOS Pathog.* **2011**, *7*, e1002158,  
737 doi:10.1371/journal.ppat.1002158.
- 738 43. Wistrand-Yuen, E.; Knopp, M.; Hjort, K.; Koskiniemi, S.; Berg, O.G.; Andersson, D.I. Evolution of  
739 High-Level Resistance during Low-Level Antibiotic Exposure. *Nat. Commun.* **2018**, *9*, 1599,  
740 doi:10.1038/s41467-018-04059-1.
- 741 44. Gressel, J. Low Pesticide Rates May Hasten the Evolution of Resistance by Increasing Mutation  
742 Frequencies. *Pest Manag. Sci.* **2011**, *67*, 253–257, doi:10.1002/ps.2071.

- 743 45. Olofsson, S.K.; Cars, O. Optimizing Drug Exposure to Minimize Selection of Antibiotic  
744 Resistance. *Clin. Infect. Dis.* **2007**, *45*, S129–S136, doi:10.1086/519256.
- 745 46. Pena-Miller, R.; Laehnemann, D.; Jansen, G.; Fuentes-Hernandez, A.; Rosenstiel, P.;  
746 Schulenburg, H.; Beardmore, R. When the Most Potent Combination of Antibiotics Selects for  
747 the Greatest Bacterial Load: The Smile-Frown Transition. *PLoS Biol.* **2013**, *11*,  
748 doi:10.1371/journal.pbio.1001540.
- 749 47. Busi, R.; Neve, P.; Powles, S. Evolved Polygenic Herbicide Resistance in *Lolium Rigidum* by Low-  
750 Dose Herbicide Selection within Standing Genetic Variation. *Evol. Appl.* **2013**, *6*, 231–242,  
751 doi:10.1111/j.1752-4571.2012.00282.x.
- 752

**Table S1: Commercial mixtures and single-fungicide formulations used to control Septoria leaf blotch on wheat in France.** For each commercial product, the composition, recommended rate and use are detailed. Percentages indicate the fraction of each AI used in the mixture, relative to the commercial product including the same AI used alone, and the total line is the equivalent amount of fungicide in a mixture.

| Use in mixture           |                |                    |                               |                                     |                                    | Commercial Product                  | Aviator Xpro<br>Oceor Xpro<br>SDH2 Pro | Karosse Xpro<br>Skyway Xpro                    | Cavando<br>Korema<br>Korema Star<br>Osiris Star<br>Osiris Win<br>Epomet | Adexar<br>Tenax XM<br>SDH1      | Librax<br>SDH-CO              | Ceratavo era<br>Elatus era<br>Velogy era | Kestrel<br>Onnel<br>Piano<br>Prosaro<br>Prosafort<br>Prosatop | Ampera<br>Diams<br>Epopée<br>Galactica<br>Nebraska |
|--------------------------|----------------|--------------------|-------------------------------|-------------------------------------|------------------------------------|-------------------------------------|----------------------------------------|------------------------------------------------|-------------------------------------------------------------------------|---------------------------------|-------------------------------|------------------------------------------|---------------------------------------------------------------|----------------------------------------------------|
|                          |                |                    |                               |                                     |                                    | Composition g.L <sup>-1</sup>       | 75+150                                 | 75+100+100                                     | 56.25+41.25<br>(or 37.5+27.5)                                           | 62.5+62.5                       | 62.5+45                       | 150+75                                   | 160+80<br>(or 125+125)                                        | 132.5+267.1                                        |
| Use as a single compound |                |                    |                               |                                     |                                    | Recommended rate l.ha <sup>-1</sup> | 1.25                                   | 1                                              | 2 (or 3)                                                                | 2                               | 2                             | 1                                        | 1                                                             | 1.5                                                |
|                          |                |                    |                               |                                     |                                    | Recommended use g.ha <sup>-1</sup>  | 93.75+156.25                           | 75+100+100                                     | 112.5+82.5                                                              | 125+125                         | 125+90                        | 150+75                                   | 160+80<br>(or 125+125)                                        | 198.75+400.65                                      |
|                          |                |                    |                               |                                     |                                    | Fungicides                          | Bixafen +<br>prothioconazole           | Bixafen +<br>prothioconazole<br>+ tebuconazole | Epoxiconazole+<br>metconazole                                           | Fluxapyroxad +<br>epoxiconazole | Fluxapyroxad +<br>metconazole | Prothioconazole<br>+ benzovindiflupyr    | Prothioconazole<br>+ tebuconazole                             | Tebuconazole +<br>prochloraz                       |
| Fungicide                | Chemical class | Commercial product | Composition g.L <sup>-1</sup> | Recommended rate l.ha <sup>-1</sup> | Recommended use g.ha <sup>-1</sup> |                                     |                                        |                                                |                                                                         |                                 |                               |                                          |                                                               |                                                    |
| Benzovindiflupyr         | SDHI           | Elatus plus        | 100                           | 0.75                                | 75                                 |                                     |                                        |                                                |                                                                         |                                 |                               | 100%                                     |                                                               |                                                    |
| Bixafen                  |                | Thore              | 125                           | 1                                   | 125                                |                                     | 75%                                    | 60%                                            |                                                                         |                                 |                               |                                          |                                                               |                                                    |
| Epoxiconazole            |                | Rubric             | 83                            | 1.5                                 | 124.5                              |                                     |                                        |                                                | 90%                                                                     | 100%                            |                               |                                          |                                                               |                                                    |
| Fluxapyroxad             |                | Imtrex             | 62.5                          | 2                                   | 125                                |                                     |                                        |                                                |                                                                         | 100%                            | 100%                          |                                          |                                                               |                                                    |

|                 |     |                                                                                                      |                    |               |                 |              |             |                 |             |             |             |             |                                           |                   |
|-----------------|-----|------------------------------------------------------------------------------------------------------|--------------------|---------------|-----------------|--------------|-------------|-----------------|-------------|-------------|-------------|-------------|-------------------------------------------|-------------------|
|                 |     | Syrex<br>Fluxatop                                                                                    |                    |               |                 |              |             |                 |             |             |             |             |                                           |                   |
| Metconazole     | DMI | Sirena                                                                                               | 90                 | 1             | 90              |              |             |                 | 92%         |             | 100%        |             |                                           |                   |
| Prochloraz      |     | Eyetak<br>Proca<br>Prochlorflash<br>Pro Plex 450<br>Faxer<br>Fujara<br>Saranta<br>Sporaz<br>Septoraz | 450                | 1             | 450             |              |             |                 |             |             |             |             |                                           | 89%               |
| Prothioconazole |     | Joao<br>Protioline                                                                                   | 250                | 0.8           | 200             |              | 94%         | 50%             |             |             |             | 75%         | 80%<br>(or 62.5%)                         |                   |
| Tebuconazole    |     | Illide<br>Mystic Ew<br>Fezan<br>Colnago<br>Rivazon<br>Erasmus<br>Spekfree<br>Curzol<br>Ulysses       | 430<br>(or<br>250) | 0.6 (or<br>1) | 258 (or<br>250) |              |             | 39-40%          |             |             |             |             | 31-32%<br>(or 48-50%)                     | 77-79.5%          |
|                 |     |                                                                                                      |                    |               |                 | <b>Total</b> | <b>169%</b> | <b>149-150%</b> | <b>182%</b> | <b>200%</b> | <b>200%</b> | <b>175%</b> | <b>111-112%<br/>(or 110.5-<br/>112.5)</b> | <b>166-168.5%</b> |



**Figure S2: Correlation between susceptibilities to test fungicides in droplet tests.**

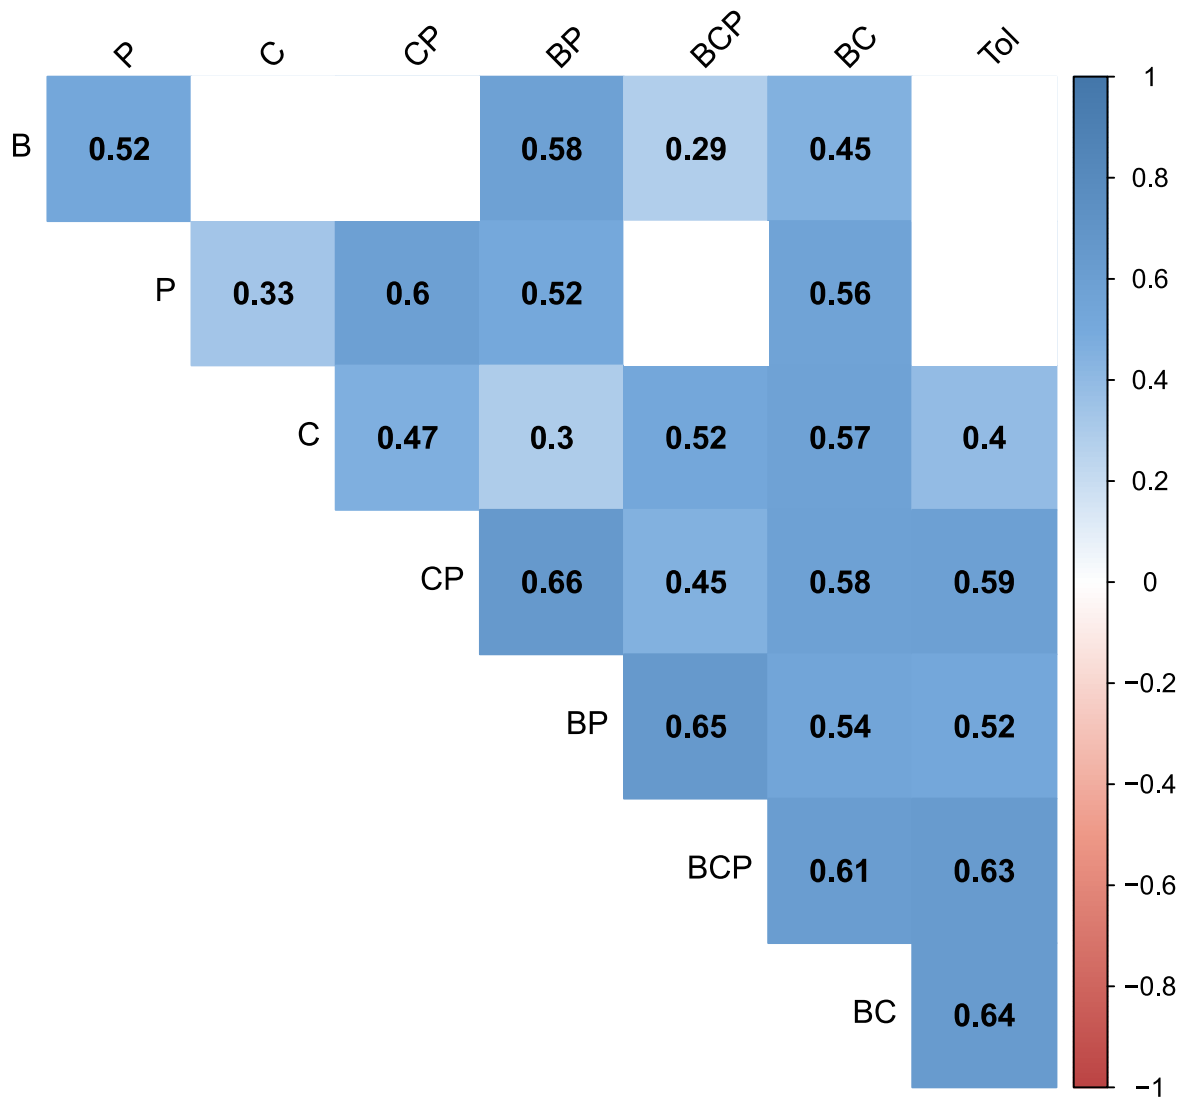

Source: https://www.biorxiv.org/content/10.1101/2021.09.15.460529v1.full.pdf
